# Supplementary material for: HvEXPB7, a novel β-expansin gene revealed by the root hair transcriptome of Tibetan wild barley, improves root hair growth under drought stress
Source: PubMed Central journal article supplement (PMC4765802; doi:10.1093/jxb/erv436), 2015-09-28
Supplement: supp_erv436_jexbot158196_file001.pdf [file supp_erv436_jexbot158196_file001.pdf]

***HvEXPB7*, a Novel  $\beta$ -Expansin Gene Revealed by Root Hair  
Transcriptome of Tibetan Wild Barley Improves Root Hair Growth  
under Drought Stress**

Xiaoyan He, Jianbin Zeng, Fangbin Cao, Imrul Mosaddek Ahmed, Guoping Zhang, Eva Vincze, Feibo Wu

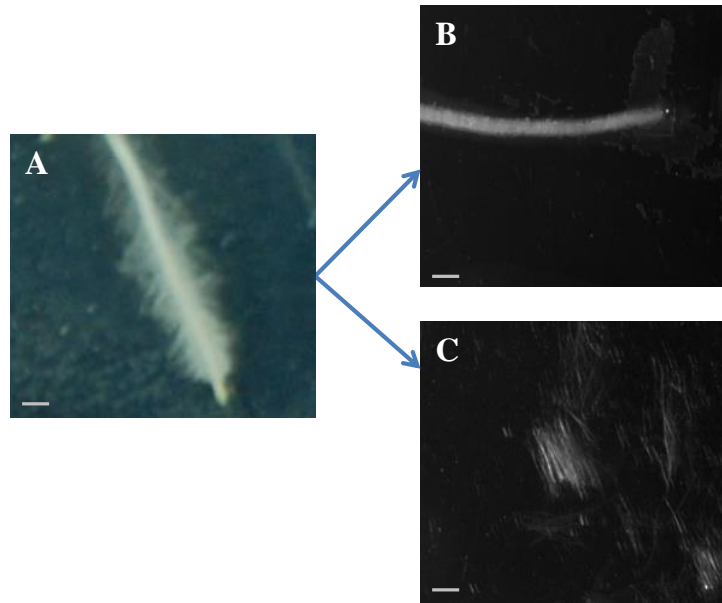

**Fig. S1. Root hair isolation.** (a) Root. (b) Stripped root. (c) Isolated root hair. Scale bars=1 mm.

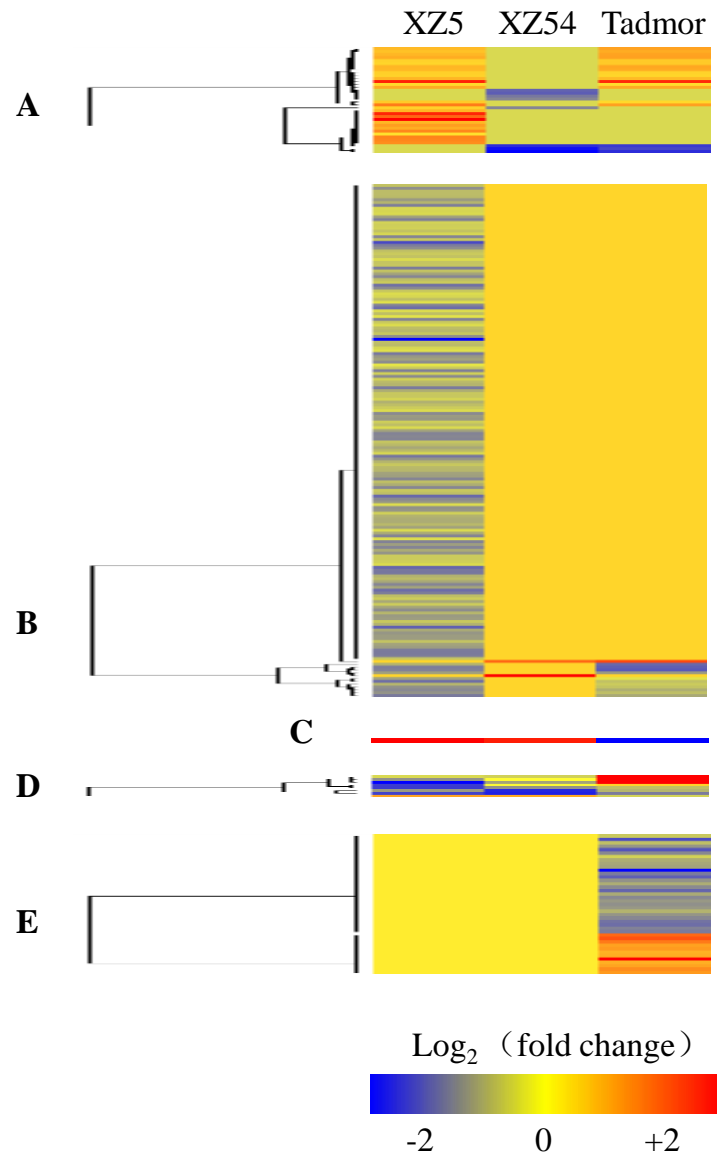

**Fig. S2. Hierarchical cluster analysis of all 266 DEGs of root hairs of XZ5, XZ54 and Tadmor according to their relative expression levels in response to drought stress.** (A) 36 DEGs up-regulated in XZ5 but down-regulated or unchanged in XZ54, or no change in XZ5 but down-regulated in XZ54. (B) 180 DEGs up-regulated in XZ54 but down-regulated or unchanged in XZ5, or unchanged in XZ54 but down-regulated in XZ5. (C) 1 DEG up-regulated in both of XZ5 and XZ54. (D) 8 DEGs down-regulated in both of XZ5 and XZ54. (E) 41 DEGs only up- or down-regulated in Tadmor. The relative expression levels and functions of these DEGs were listed in Supplementary Table S4-S8. Hierarchical clustering of DEGs was displayed by pearson correlation and pairwise average-linkage as a measurement of similarity.

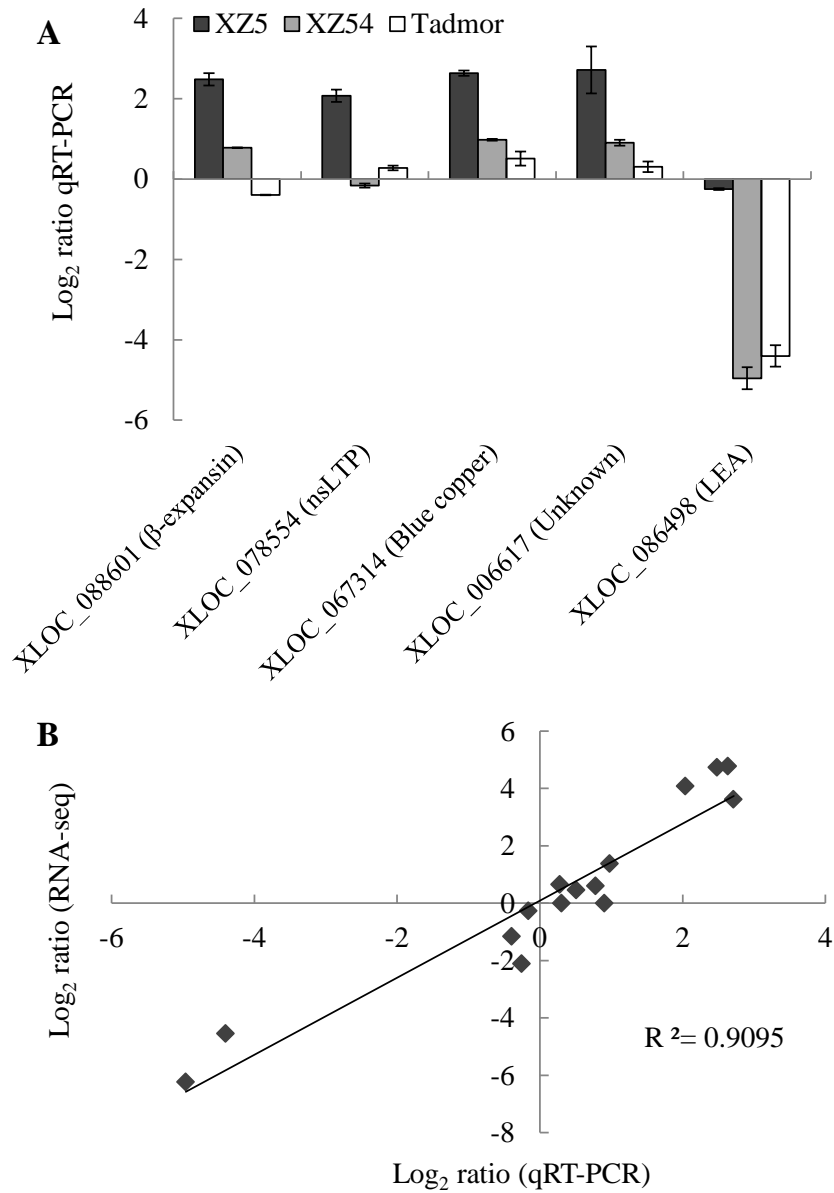

**Fig. S3. Expression profiles confirmation of five root hair genes by qRT-PCR in three barely genotypes.** (A) qRT-PCR of five genes in XZ5, XZ54 and Tadmor. The fold changes in gene expression were transformed to  $\log_2$  scale (with three biological replications and three technology replications). (B) The qRT-PCR data  $\log_2$ -values (X-axis) were plotted against the RNA-seq  $\log_2$  values (Y-axis) ( $R^2=0.9095$ ;  $P < 0.001$ ).

```

1      aatctccccaacggcattaaccaccagagtagggtcatcgatcagtaaccaacgagaccagcaagcgagccatggcagcggccttttct
                                     M A A A F S S
91     cctactcgcgtcggcggccttttctctgcctgctcggccaacggctgctcggctgcccctggttttctcctgctacatttctgccctg
    Y S V A A A F L C L L A A N G C C G C P W F L P A T F C P E
181    aaccgacaccgaccccatacctacacctgaccccgtccagctacacctcgcctgctctggctacccccagccaggtccggctctg
    P T P D P I P T P D P A P A T P P P A L A T P S P G S G S G
271    gcagcgcaacggttccatgggctggctggacgccagggccacatggtacggcgtccggatggcggcggccttggacaacggtg
    S A N G S M G G W L D A R A T W Y G A P D G A G P L D N G G
361    ggcgctcgggttcaagaacgtgaacctgcccccttcaacgccatgacgtcgtcggcaacgagccgatcttcaaggacggcaaggat
    A C G F K N V N L P P F N A M T S C G N E P I F K D G K G C
451    gcggtcctgctaccagataaggtgctgggcaagttcaccagcgtgctccggcgaccccagagcggatgatcaccgacatgaact
    G S C Y Q I R C V G K V H P A C S G D P E T V I I T D M N Y
541    actaccggctcccgcctaccacttcgacctcagcggcactgccttcggcgccatggccaaggcggcgcgaacgacgagctccgccag
    Y P V A R Y H F D L S G T A F G A M A K D G R N D E L R H A
631    ccggcatcatcgacatgcagttcaagagggtcctgcccagtagcacagggtgctccgtgacgtttcacgtggagaaggggtcgaaccca
    G I I D M Q F K R V P C Q Y T G L S V T F H V E K G S N P N
721    attacctggcgatectggtggagtacgggaacggcgacggcgacgtggcgaggtggacctcatggacggcgagccaacgggtgctct
    Y L A I L V E Y G N G D G D V A Q V D L M D G G E P T V S W
811    ggaggccgatgaggagtcctggggctccatctggcgctggacacggcgcccccttcggggcccttctcgtcgggtcaccaacg
    R P M R E S W G S I W R L D T R R P L R G P F S L R V T N G
901    ggtccggcaggtcgtcgtcgggaccaggtcatccccgcgactggcagcccacacgtgtacagctccgacgtccagttcgatgaat
    S G R S L V A D Q V I P A D W Q P D T V Y S S D V Q F D E *
991    gatcccgatgatccatggaagcagtcacgtacgtccatgcctgcatttttggccaagctatatagctgagacgtcgcct
1081  gtgacttccggtgcaagtcctcgtcgtgctacatgtacatgtacacgtagtagacataacatacgtggcagctttaattagtttg
1171  tgggatctggagtaggcagcagtagtatatatgtctcgcagctataaatttactgttgaatttctcctgtattacacaagtttattat
1261  gtcactggtgtgataaa

```

**Fig. S4. The nucleotide and amino acid sequences of *HvEXPB7*.**

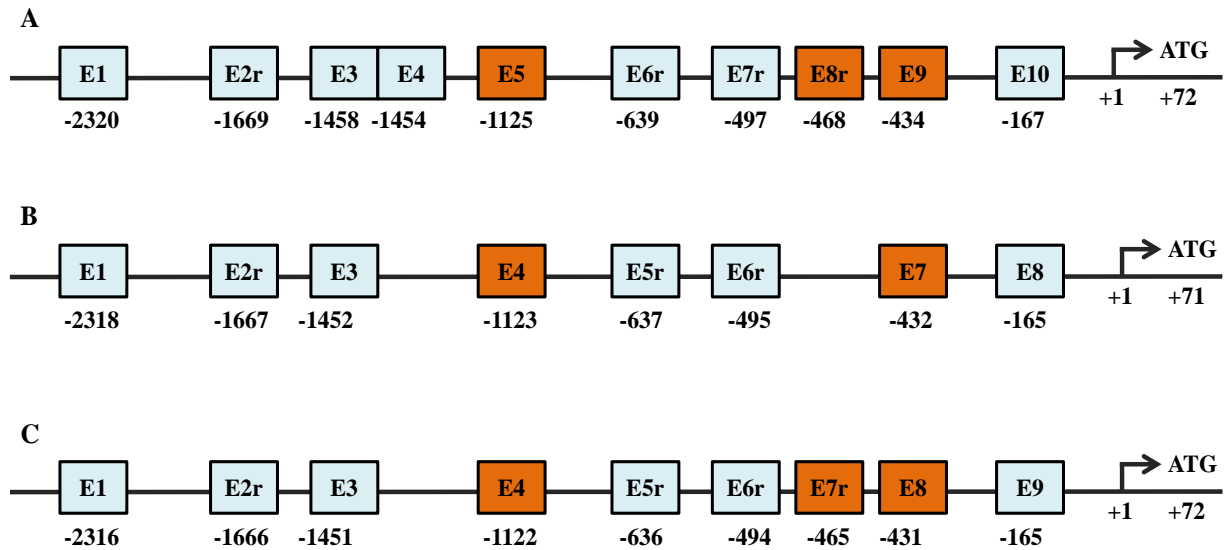

**Fig. S5. Relative positions of RHEs in the *HvEXPB7* promoter regions of XZ5, XZ54 and Tadmor.** (A) XZ5. (B) XZ54. (C) Tadmor. Numbers below the sequence represent the nucleotide positions of the RHE motifs (light blue and orange red boxes) relative to the putative transcription initiation site (+1). ‘r’ indicates that the RHE is in the reverse direction. RHEs with major- and minor-type consensus sequences are boxed in orange red and light blue, respectively.

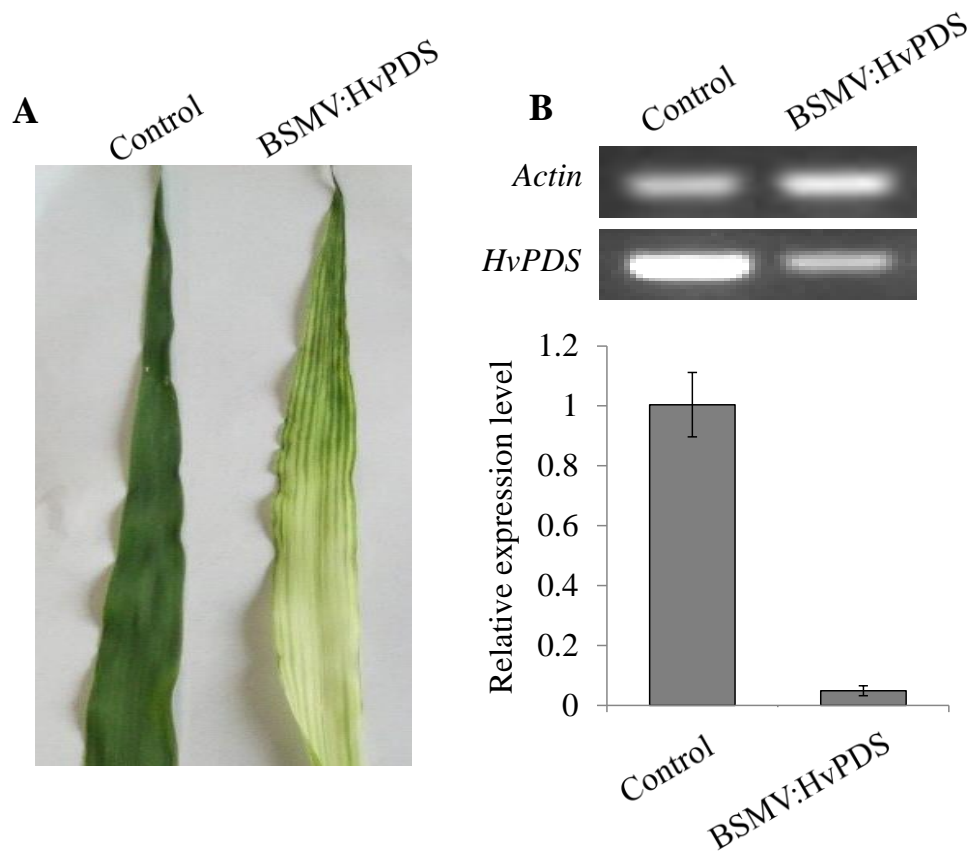

**Fig. S6. Silencing of the phytoene desaturase (*PDS*) gene in wild barley XZ5 using BSMV-VIGS.** (A) Photobleaching symptom of BSMV:HvPDS inoculated plants in contrast to those treated with empty vectors. Photograph was taken 21 dpi. (B) RT-PCR analysis of *HvPDS* transcript abundance in leaves of XZ5 21 dpi.

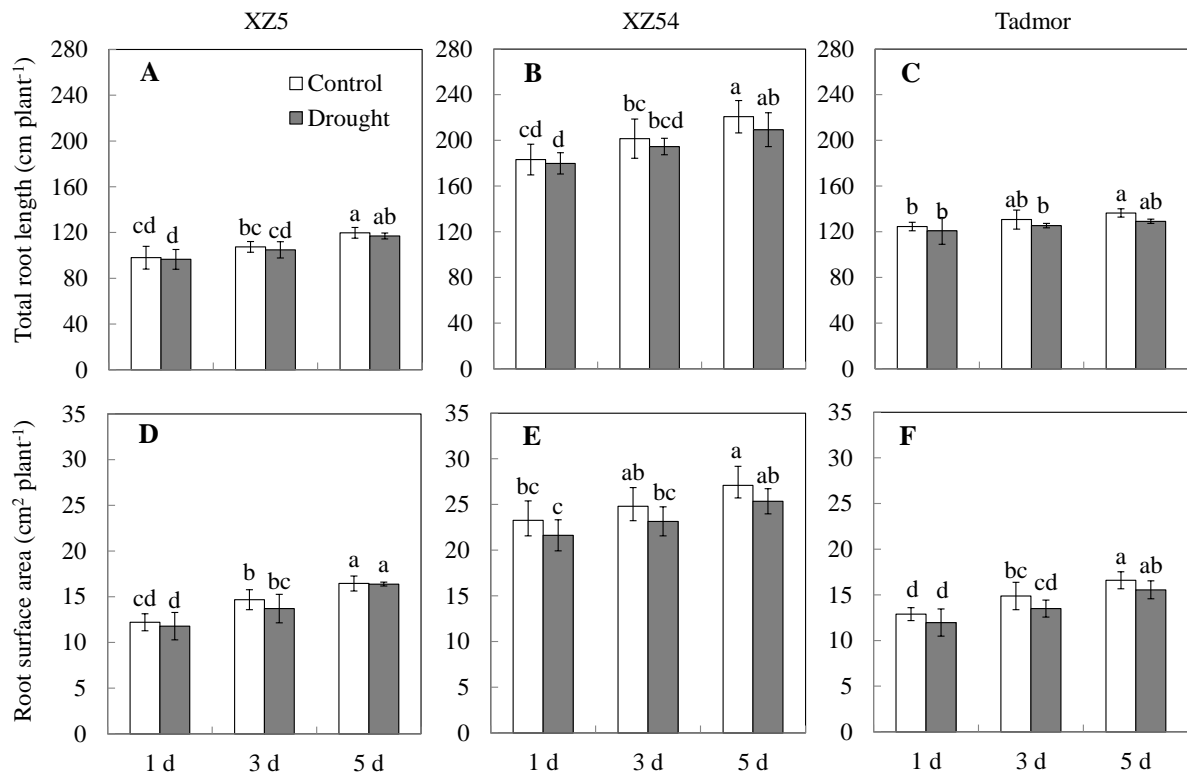

**Fig. S7.** Root scanning of the root length (A, B, C) and root surface area (D, E, F) of Tibetan wild barley XZ5 (left panel), XZ54 (middle panel) and *cv.* Tadmor (right panel) grown under control or drought conditions. Error bars represent SD values (n=6). Different letters indicate significant differences ( $P < 0.05$ ) among the treatments within each genotype.



**Table S1** List of real-time PCR primers for confirmation of RNA-Seq

| <b>Gene Id</b> | <b>Description</b>                                      | <b>Forward primer (5' → 3')</b>                                               |
|----------------|---------------------------------------------------------|-------------------------------------------------------------------------------|
| XLOC_088601    | Beta-expansin 1a expressed                              | Forward primer: GCCTTGATGCCAATCACCAG<br>Reverse primer: TGGTTAATGCCGTTGGGGAG  |
| XLOC_078554    | Non-specific lipid-transfer protein precursor           | Forward primer: ATCTCACCCCCTAACACCCA<br>Reverse primer: ATGGCGTCTCTGGA ACTCTG |
| XLOC_067314    | Blue copper                                             | Forward primer: ACGCGGAATCCAGTTACTAGC<br>Reverse primer: CACAAGCAGCGTGATCAGAG |
| XLOC_006617    | Unknown                                                 | Forward primer: GCACCGCCAGGAAGAAAAG<br>Reverse primer: ATGTAGCGCACAAGGAACGA   |
| XLOC_086498    | Similarity to late embryogenesis abundant protein (LEA) | Forward primer: ACCCATCCTTCTCCACCAGT<br>Reverse primer: CGTACGGCCAGTACAACACT  |
| Actin          |                                                         | Forward primer: TGGCTGACGGTGAGGACA<br>Reverse primer: CGAGGGCGACCAACTATG      |

**Table S2** List of PCR primers for HvEXPB7 cloning and function verification

| <b>Primer name</b> | <b>Primer sequence (5' → 3')</b>              |
|--------------------|-----------------------------------------------|
| GSPF               | TTCAAGGACGGCAAGGGATG                          |
| GSPR               | GTTTCGACCCCTTCTCCACGT                         |
| UPM-S              | CTAATACGACTCACTATAGGGC                        |
| UPM -L             | CTAATACGACTCACTATAGGGCAAGCAGTGGTATCAACGCAGAGT |
| EXPB7F             | CAATCTCCCAACGGCATTAAAC                        |
| EXPB7R             | TTTATACACACCAGTGACATAAT                       |
| EXPB7-promoter-F   | TTCGCAAGTTTAAATCATCACAAG                      |
| EXPB7-promoter R   | CAACGAGACCAGCAAGCGAGCC                        |
| EXPB7-CDS-F        | ATGGCAGCGGCCTTTTCCTC                          |
| EXPB7-CDS-R        | TCATTCATCGAACTGGACGT                          |
| EXPB7-35S:sGFP-F   | CTCAGGTACCATGGCAGCGGCCTTTTCC                  |
| EXPB7-35S:sGFP-R   | CTAGTCTAGATTTCATCGAACTGGACGTC                 |
| EXPB7- $\gamma$ -F | GTACGCTAGCACCCATACCTACACCTG                   |
| EXPB7- $\gamma$ -R | GTACGCTAGCATCCCTTGCCGTCCTTG                   |
| PDS- $\gamma$ -F   | GTACGCTAGCCGACGAGGTTTTTATTGC                  |
| PDS- $\gamma$ -R   | GTACGCTAGCAGTTATTTGAGTCCCGTC                  |
| EXPB7-RT-PCR-F     | TCAAGAACGTGAACCTGCCG                          |
| EXPB7-RT-PCR-R     | CTTGCCACGCACCTTATCT                           |
| PDS- RT-PCR -F     | AGTCTTTGGGTGGTGAGGTC                          |
| PDS- RT-PCR -R     | CTTGAAGATATCGACTGGTG                          |
| $\gamma$ -stain-F  | CAACTGCCAATCGTGAGTAGG                         |
| ActinF             | TGGCTGACGGTGAGGACA                            |
| ActinR             | CGAGGGCGACCAACTATG                            |

**Table S3** Summary of root hair reads numbers of XZ5, XZ54 and Tadmor, and their mapped results to barely genome

| Sample                | Genotype |          |          |          |          |          |
|-----------------------|----------|----------|----------|----------|----------|----------|
|                       | XZ5      |          | XZ54     |          | Tadmor   |          |
|                       | Control  | Drought  | Control  | Drought  | Control  | Drought  |
| Raw reads             | 29476018 | 26423412 | 27690596 | 27698298 | 29397348 | 24862762 |
| Clean reads           | 29433186 | 26415212 | 27682280 | 27689364 | 29385518 | 24854408 |
| Clean data rate       | 96.00%   | 97.43%   | 97.42%   | 97.38%   | 97.30%   | 97.32%   |
| Total mapped reads    | 29433186 | 26415212 | 27682280 | 27689364 | 29385518 | 24854408 |
| Uniquely mapped       | 20547478 | 15475014 | 19158705 | 21098069 | 21871926 | 14753813 |
| Multiple mapped reads | 3832360  | 7075850  | 4007429  | 3256107  | 3656852  | 6376676  |
| Unmapped reads        | 5048859  | 3862596  | 4515124  | 3333126  | 3855525  | 3722213  |
| Exp_gene_number       | 46383    | 43005    | 45318    | 45145    | 45247    | 42570    |

**Table S4** DEGs up-regulated in XZ5 but down-regulated or unchanged in XZ54, or no change in XZ5 but down-regulated in XZ54

| GeneId                                                  | Log <sub>2</sub> (fold change) |       |        | Description                                                           |
|---------------------------------------------------------|--------------------------------|-------|--------|-----------------------------------------------------------------------|
|                                                         | XZ5                            | XZ54  | Tadmor |                                                                       |
| <b>Energy</b>                                           |                                |       |        |                                                                       |
| XLOC_004739                                             | 3.24                           | —     | 3.95   | ATP synthase subunit beta                                             |
| XLOC_006853                                             | 2.58                           | —     | 2.48   | ATP synthase subunit beta                                             |
| XLOC_012447                                             | 3.66                           | —     | 3.99   | ATP synthase subunit beta                                             |
| XLOC_013896                                             | 3.69                           | —     | 3.68   | ATP sulfurylase                                                       |
| XLOC_016879                                             | 3.33                           | —     | 3.92   | ATP synthase subunit beta                                             |
| XLOC_013018                                             | 3.40                           | —     | 3.24   | Plastid glutamine synthetase 2                                        |
| <b>Cell wall modification and root hair development</b> |                                |       |        |                                                                       |
| XLOC_024622                                             | 3.35                           | —     | —      | Cell wall-associated hydrolase                                        |
| XLOC_031639                                             | 5.79                           | —     | —      | Xyloglucan endotransglycosylase hydrolase protein 8                   |
| XLOC_012543                                             | 2.42                           | —     | 2.75   | Cell wall-associated hydrolase                                        |
| XLOC_088601                                             | 4.74                           | —     | —      | Beta-expansin 1a expressed                                            |
| <b>Transcription</b>                                    |                                |       |        |                                                                       |
| XLOC_004913                                             | 3.00                           | —     | 3.65   | rRNA intron-encoded homing endonuclease                               |
| XLOC_006324                                             | 2.50                           | —     | 2.39   | rRNA intron-encoded homing endonuclease                               |
| <b>Metabolism</b>                                       |                                |       |        |                                                                       |
| XLOC_094366                                             | 2.06                           | —     | —      | Serine acetyltransferase                                              |
| XLOC_012656                                             | 2.50                           | —     | 2.72   | Aldolase-type TIM barrel family protein isoform 1                     |
| XLOC_018005                                             | 2.75                           | —     | 2.29   | Leucine rich protein                                                  |
| XLOC_020158                                             | 8.83                           | —     | —      | Small glutamine-rich tetratricopeptide repeat-containing protein beta |
| <b>Stress defense</b>                                   |                                |       |        |                                                                       |
| XLOC_014532                                             | 7.86                           | —     | 7.60   | Cytochrome p450 liketbp                                               |
| XLOC_019100                                             | 4.86                           | —     | —      | Peroxidase 52                                                         |
| XLOC_032107                                             | 3.32                           | —     | —      | Cold-regulated protein blt14                                          |
| XLOC_085743                                             | —                              | -3.61 | —      | Peroxidase 12                                                         |
| XLOC_086498                                             | —                              | -6.23 | -4.55  | Similarity to late embryogenesis abundant protein                     |
| XLOC_088358                                             | —                              | -5.31 | -4.90  | Similarity to late embryogenesis abundant protein                     |
| <b>Unknown</b>                                          |                                |       |        |                                                                       |
| XLOC_040065                                             | 2.58                           | -2.59 | —      | Conserved domain partial                                              |
| XLOC_049979                                             | 2.31                           | —     | 2.18   | Conserved protein                                                     |
| XLOC_057865                                             | —                              | -3.00 | —      | ORF16-lacZ fusion protein                                             |
| XLOC_062616                                             | 3.36                           | —     | 3.82   | Hypothetical protein                                                  |
| XLOC_088641                                             | —                              | -6.68 | -5.28  | Predicted protein                                                     |
| XLOC_003324                                             | —                              | -3.80 | —      | Predicted protein                                                     |
| XLOC_006617                                             | 3.63                           | —     | —      | ---NA---                                                              |
| XLOC_064342                                             | —                              | -2.55 | —      | Conserved protein                                                     |
| XLOC_060028                                             | 5.14                           | —     | 4.03   | Conserved hypothetical protein                                        |
| XLOC_028401                                             | 4.57                           | —     | —      | Hypothetical protein ZEAMMB73_284819                                  |
| XLOC_025502                                             | 3.29                           | —     | 3.68   | ORF16-lacZ fusion protein                                             |

— represents no change.

**Table S5** DEGs up-regulated in XZ54 but down-regulated/unchanged in XZ5, or unchanged in XZ54 but down-regulated in XZ5

| Gene Id                  | Log <sub>2</sub> (fold change) |      |        | Description                       |
|--------------------------|--------------------------------|------|--------|-----------------------------------|
|                          | XZ5                            | XZ54 | Tadmor |                                   |
| <b>Protein synthesis</b> |                                |      |        |                                   |
| XLOC_075318              | -2.74                          | —    | —      | 40s ribosomal protein s10         |
| XLOC_079203              | -3.26                          | —    | —      | 40s ribosomal protein s11         |
| XLOC_020875              | -2.47                          | —    | —      | 40s ribosomal protein s12         |
| XLOC_070718              | -3.36                          | —    | —      | 40s ribosomal protein s13         |
| XLOC_039539              | -2.70                          | —    | —      | 40s ribosomal protein s14         |
| XLOC_046148              | -3.90                          | —    | —      | 40s ribosomal protein s14         |
| XLOC_081223              | -3.64                          | —    | —      | 40s ribosomal protein s15         |
| XLOC_054162              | -3.55                          | —    | —      | 40s ribosomal protein s15a-1-like |
| XLOC_082918              | -3.75                          | —    | —      | 40s ribosomal protein s18         |
| XLOC_032123              | -2.85                          | —    | —      | 40s ribosomal protein s19         |
| XLOC_040402              | -3.23                          | —    | —      | 40s ribosomal protein s23         |
| XLOC_092443              | -3.71                          | —    | —      | 40s ribosomal protein s23         |
| XLOC_007060              | -3.32                          | —    | —      | 40s ribosomal protein s24         |
| XLOC_054218              | -3.73                          | —    | —      | 40s ribosomal protein s24         |
| XLOC_015079              | -3.39                          | —    | —      | 40s ribosomal protein s25-1       |
| XLOC_083823              | -2.34                          | —    | —      | 40s ribosomal protein s26         |
| XLOC_052949              | -3.47                          | —    | —      | 40s ribosomal protein s27         |
| XLOC_000608              | -3.77                          | —    | —      | 40s ribosomal protein s27a        |
| XLOC_069430              | -3.56                          | —    | —      | 40s ribosomal protein s28         |
| XLOC_013012              | -3.64                          | —    | —      | 40s ribosomal protein s30         |
| XLOC_008838              | -7.72                          | —    | —      | 40s ribosomal protein s3a         |
| XLOC_073619              | -3.86                          | —    | —      | 40s ribosomal protein s3a-like    |
| XLOC_048775              | -3.87                          | —    | —      | 40s ribosomal protein s4          |
| XLOC_000670              | -3.27                          | —    | —      | 40s ribosomal protein s5          |
| XLOC_094261              | -2.91                          | —    | —      | 40s ribosomal protein s6          |
| XLOC_070590              | -3.81                          | —    | —      | 40s ribosomal protein s6          |
| XLOC_077626              | -2.74                          | —    | —      | 40s ribosomal protein s9          |
| XLOC_069897              | -3.28                          | —    | —      | 40s ribosomal protein sa          |
| XLOC_086164              | -4.07                          | —    | —      | 60s acidic ribosomal protein p2a  |
| XLOC_074236              | -2.55                          | —    | —      | 60s acidic ribosomal protein p3   |
| XLOC_050223              | -4.04                          | —    | —      | 60s ribosomal protein l10a-1      |
| XLOC_089139              | -5.33                          | —    | —      | 60s ribosomal protein l10a-1      |
| XLOC_052453              | -3.18                          | —    | —      | 60s ribosomal protein l11-1       |
| XLOC_085384              | -2.72                          | —    | —      | 60s ribosomal protein l12         |
| XLOC_024978              | -3.21                          | —    | —      | 60s ribosomal protein l12         |
| XLOC_000238              | -3.97                          | —    | —      | 60s ribosomal protein l13-2       |
| XLOC_072997              | -3.00                          | —    | —      | 60s ribosomal protein l13a        |
| XLOC_074061              | -3.24                          | —    | —      | 60s ribosomal protein l13a        |
| XLOC_059199              | -4.13                          | —    | —      | 60s ribosomal protein l14-1       |
| XLOC_070829              | -3.95                          | —    | —      | 60s ribosomal protein l15         |
| XLOC_087363              | -3.05                          | —    | —      | 60s ribosomal protein l17         |
| XLOC_027406              | -2.97                          | —    | —      | 60s ribosomal protein l18         |
| XLOC_069091              | -3.72                          | —    | —      | 60s ribosomal protein l18a        |

| Gene Id           | Log <sub>2</sub> (fold change) |      |        | Description                                                          |
|-------------------|--------------------------------|------|--------|----------------------------------------------------------------------|
|                   | XZ5                            | XZ54 | Tadmor |                                                                      |
| XLOC_068657       | -3.40                          | —    | —      | 60s ribosomal protein l21                                            |
| XLOC_081378       | -3.60                          | —    | —      | 60s ribosomal protein l22-2                                          |
| XLOC_052029       | -2.50                          | —    | —      | 60s ribosomal protein l23                                            |
| XLOC_073457       | -4.11                          | —    | —      | 60s ribosomal protein l23                                            |
| XLOC_087786       | -2.90                          | —    | —      | 60s ribosomal protein l24                                            |
| XLOC_088045       | -4.68                          | —    | -2.44  | 60s ribosomal protein l27                                            |
| XLOC_073413       | -3.29                          | —    | —      | 60s ribosomal protein l28                                            |
| XLOC_044358       | -3.48                          | —    | —      | 60s ribosomal protein l28                                            |
| XLOC_054228       | -2.78                          | —    | —      | 60s ribosomal protein l29                                            |
| XLOC_079130       | -2.73                          | —    | —      | 60s ribosomal protein l31                                            |
| XLOC_030675       | -3.17                          | —    | —      | 60s ribosomal protein l32-1                                          |
| XLOC_023616       | -2.59                          | —    | —      | 60s ribosomal protein l34                                            |
| XLOC_022235       | -2.90                          | —    | —      | 60s ribosomal protein l35                                            |
| XLOC_086081       | -3.08                          | —    | —      | 60s ribosomal protein l36                                            |
| XLOC_048731       | -3.74                          | —    | —      | 60s ribosomal protein l37                                            |
| XLOC_071115       | -3.72                          | —    | —      | 60s ribosomal protein l37a                                           |
| XLOC_076961       | -4.29                          | —    | —      | 60s ribosomal protein l37a                                           |
| XLOC_000488       | -3.29                          | —    | —      | 60s ribosomal protein l39                                            |
| XLOC_005927       | -3.37                          | —    | —      | 60s ribosomal protein l39                                            |
| XLOC_064561       | -2.74                          | —    | —      | 60s ribosomal protein l4                                             |
| XLOC_050541       | -3.67                          | —    | —      | 60s ribosomal protein l4                                             |
| XLOC_071105       | -4.67                          | —    | —      | 60s ribosomal protein l44                                            |
| XLOC_018594       | -4.97                          | —    | —      | 60s ribosomal protein l44                                            |
| XLOC_052973       | -3.37                          | —    | —      | 60s ribosomal protein l5                                             |
| XLOC_077183       | -2.90                          | —    | —      | 60s ribosomal protein l6                                             |
| XLOC_034007       | -3.72                          | —    | —      | 60s ribosomal protein l7-1                                           |
| XLOC_038379       | -3.43                          | —    | —      | 60s ribosomal protein l7-2                                           |
| XLOC_048797       | -3.44                          | —    | —      | 60s ribosomal protein l7a                                            |
| XLOC_072252       | -3.38                          | —    | —      | 60s ribosomal protein l7a-like                                       |
| XLOC_077210       | -2.83                          | —    | —      | 60s ribosomal protein l8                                             |
| XLOC_039836       | -3.88                          | —    | —      | 60s ribosomal protein l9                                             |
| XLOC_070264       | -3.09                          | —    | —      | ribosomal protein l3                                                 |
| XLOC_053311       | -3.88                          | —    | —      | ribosomal protein l3                                                 |
| XLOC_014690       | -5.68                          | —    | —      | ribosomal protein l35a                                               |
| XLOC_077690       | -2.62                          | —    | —      | ribosomal protein s8e family protein                                 |
| XLOC_089142       | -3.53                          | —    | —      | ubiquitin-60s ribosomal protein l40-like                             |
| XLOC_067175       | -3.57                          | —    | —      | h aca ribonucleoprotein complex subunit 1-like protein 1             |
| <b>Metabolism</b> |                                |      |        |                                                                      |
| XLOC_067835       | -4.15                          | —    | -6.62  | n- acetylneuraminyllactose-wheat germ agglutinin isolectin complexes |
| XLOC_023275       | -4.81                          | —    | -5.02  | bowman-birk type trypsin inhibitor                                   |
| XLOC_084419       | -4.85                          | —    | —      | btb poz domain-containing protein npy2-like                          |
| XLOC_082237       | -4.45                          | —    | —      | enoyl                                                                |
| XLOC_059664       | -5.82                          | —    | —      | floral organ regulator partial                                       |
| XLOC_072581       | -4.00                          | —    | -3.28  | fructan:fructan 1-fructosyltransferase                               |
| XLOC_066763       | -5.69                          | —    | —      | glucan endo- -beta-glucosidase-like protein 3-like                   |
| XLOC_066593       | -4.71                          | —    | —      | glycine-rich rna-binding protein 2                                   |

| Gene Id              | Log <sub>2</sub> (fold change) |      |        | Description                                           |
|----------------------|--------------------------------|------|--------|-------------------------------------------------------|
|                      | XZ5                            | XZ54 | Tadmor |                                                       |
| XLOC_084315          | -3.75                          | —    | —      | pescadillo homolog                                    |
| XLOC_088471          | -3.14                          | —    | —      | plasminogen activator inhibitor 1 rna-binding protein |
| XLOC_020421          | -5.96                          | —    | -6.91  | polygalacturonase precursor                           |
| XLOC_049760          | -3.78                          | —    | —      | nucleolar protein 56-like                             |
| XLOC_058943          | -2.71                          | —    | —      | nucleoside diphosphate kinase 1                       |
| XLOC_023030          | -5.52                          | —    | —      | nucleotide-diphospho-sugar transferase                |
| XLOC_059652          | -3.52                          | —    | —      | probable nucleolar protein 5-2-like                   |
| XLOC_037868          | -6.12                          | —    | —      | probable xyloglucan glycosyltransferase 3-like        |
| XLOC_019557          | -5.78                          | —    | —      | proliferating cell nuclear antigen                    |
| XLOC_080710          | -5.03                          | —    | —      | xylanase inhibitor                                    |
| XLOC_035315          | -5.91                          | —    | —      | xyloglucan endotransglycosylase                       |
| XLOC_021898          | -4.94                          | —    | —      | rrna 2 -o-methyltransferase fibrillar 2-like          |
| XLOC_032762          | -10.20                         | —    | —      | soluble starch synthase ii-1                          |
| XLOC_072428          | -3.29                          | —    | —      | sucrose:sucrose 1-fructosyltransferase                |
| <b>Transcription</b> |                                |      |        |                                                       |
| XLOC_088407          | -4.42                          | —    | —      | iq calmodulin-binding motif family protein            |
| XLOC_077254          | -5.07                          | —    | —      | transcription factor                                  |
| XLOC_002612          | -4.90                          | —    | —      | histone                                               |
| XLOC_030128          | -5.07                          | —    | —      | histone                                               |
| XLOC_004416          | -5.10                          | —    | —      | histone                                               |
| XLOC_004357          | -6.06                          | —    | —      | histone                                               |
| XLOC_091211          | -6.49                          | —    | —      | histone                                               |
| XLOC_056012          | -4.81                          | —    | —      | histone h2a                                           |
| XLOC_035520          | -5.67                          | —    | —      | histone h2a                                           |
| XLOC_002279          | -4.67                          | —    | —      | histone                                               |
| XLOC_050837          | -6.96                          | —    | —      | histone h2ax                                          |
| XLOC_090463          | -3.87                          | —    | —      | histone h2b                                           |
| XLOC_091768          | -5.65                          | —    | —      | histone h2b                                           |
| XLOC_000527          | -4.46                          | —    | —      | histone h3                                            |
| XLOC_079769          | -4.49                          | —    | —      | histone h3                                            |
| XLOC_004411          | -4.84                          | —    | —      | histone h3                                            |
| XLOC_004571          | -5.24                          | —    | —      | histone h3                                            |
| XLOC_037264          | -5.51                          | —    | —      | histone h3                                            |
| XLOC_044200          | -5.93                          | —    | —      | histone h3                                            |
| XLOC_031968          | -6.72                          | —    | —      | histone h3                                            |
| XLOC_017764          | -5.48                          | —    | —      | histone H3.2                                          |
| XLOC_000112          | -4.30                          | —    | —      | histone h4                                            |
| XLOC_002050          | -4.33                          | —    | —      | histone h4                                            |
| XLOC_020172          | -6.01                          | —    | —      | histone h4                                            |
| XLOC_053550          | -6.64                          | —    | —      | histone partial                                       |
| XLOC_027882          | -5.73                          | —    | —      | histone superfamily protein                           |
| XLOC_078906          | -3.99                          | —    | —      | probable histone h2a variant 3-like                   |
| <b>Cell growth</b>   |                                |      |        |                                                       |
| XLOC_079294          | -5.51                          | —    | -4.23  | alpha-expansin 11 precursor family protein            |
| XLOC_023702          | -4.68                          | —    | —      | expansin a14                                          |
| XLOC_081596          | -2.73                          | —    | —      | elongation factor 1-beta                              |

| Gene Id               | Log <sub>2</sub> (fold change) |      |        | Description                                                          |
|-----------------------|--------------------------------|------|--------|----------------------------------------------------------------------|
|                       | XZ5                            | XZ54 | Tadmor |                                                                      |
| XLOC_091348           | -5.93                          | —    | —      | high mobility group b protein 7-like                                 |
| XLOC_001013           | —                              | 7.54 | —      | cuticle protein                                                      |
| XLOC_007466           | —                              | 3.93 | 5.02   | cortical cell-delineating protein                                    |
| XLOC_058291           | -5.27                          | —    | -3.53  | cortical cell-delineating protein precursor                          |
| XLOC_073825           | -4.86                          | —    | —      | tubulin beta-1 chain-like                                            |
| <b>Stress defense</b> |                                |      |        |                                                                      |
| XLOC_051168           | -5.14                          | —    | -3.68  | pathogenesis-related protein pr-1-like                               |
| XLOC_069149           | -4.35                          | —    | —      | peroxidase 12                                                        |
| XLOC_074244           | -4.14                          | —    | —      | peroxidase 12-like                                                   |
| <b>Unknown</b>        |                                |      |        |                                                                      |
| XLOC_052824           | -5.11                          | —    | —      | hypothetical protein F775_23023                                      |
| XLOC_086268           | -3.86                          | —    | —      | hypothetical protein TRIUR3_19916                                    |
| XLOC_055368           | -3.11                          | —    | —      | ---NA---                                                             |
| XLOC_030033           | -4.39                          | —    | —      | ---NA---                                                             |
| XLOC_066162           | -4.59                          | —    | —      | ---NA---                                                             |
| XLOC_062550           | -4.59                          | —    | —      | ---NA---                                                             |
| XLOC_052773           | -4.64                          | —    | —      | ---NA---                                                             |
| XLOC_063492           | -4.64                          | —    | —      | ---NA---                                                             |
| XLOC_018595           | -4.77                          | —    | —      | ---NA---                                                             |
| XLOC_063388           | -5.07                          | —    | —      | ---NA---                                                             |
| XLOC_020560           | -5.33                          | —    | —      | ---NA---                                                             |
| XLOC_042487           | -5.42                          | —    | —      | ---NA---                                                             |
| XLOC_036694           | -5.42                          | —    | —      | ---NA---                                                             |
| XLOC_086267           | -5.48                          | —    | —      | ---NA---                                                             |
| XLOC_024947           | -5.60                          | —    | —      | ---NA---                                                             |
| XLOC_029127           | -5.66                          | —    | —      | ---NA---                                                             |
| XLOC_035662           | -5.70                          | —    | —      | ---NA---                                                             |
| XLOC_041302           | -5.71                          | —    | —      | ---NA---                                                             |
| XLOC_086452           | -5.79                          | —    | -7.15  | ---NA---                                                             |
| XLOC_070581           | -5.79                          | —    | —      | ---NA---                                                             |
| XLOC_050650           | -5.89                          | —    | —      | ---NA---                                                             |
| XLOC_057217           | -6.03                          | —    | —      | ---NA---                                                             |
| XLOC_036913           | -6.09                          | —    | —      | ---NA---                                                             |
| XLOC_038742           | -6.19                          | —    | —      | ---NA---                                                             |
| XLOC_066253           | -6.37                          | —    | —      | ---NA---                                                             |
| XLOC_037637           | -6.44                          | —    | -3.62  | ---NA---                                                             |
| XLOC_071146           | -3.54                          | —    | —      | nucl1_orysj ame: full=nucleolin 1 ame: full=protein nucleolin like 1 |
| XLOC_039880           | -5.92                          | —    | —      | predicted protein                                                    |
| XLOC_072929           | -5.97                          | —    | —      | predicted protein                                                    |
| XLOC_071850           | -6.07                          | —    | -4.44  | predicted protein                                                    |
| XLOC_090738           | -6.14                          | —    | —      | predicted protein                                                    |
| XLOC_056048           | -4.88                          | —    | —      | PREDICTED: uncharacterized protein LOC100830818                      |
| XLOC_002739           | -4.30                          | —    | —      | protein                                                              |
| XLOC_094886           | -4.63                          | —    | —      | protein                                                              |
| XLOC_049284           | -5.39                          | —    | —      | protein                                                              |
| XLOC_041525           | -5.65                          | —    | —      | protein                                                              |
| XLOC_045462           | -5.92                          | —    | —      | protein                                                              |
| XLOC_040319           | -6.52                          | —    | —      | protein                                                              |
| XLOC_024380           | -5.16                          | —    | —      | Protein H2A.5                                                        |



| Gene Id     | Log <sub>2</sub> (fold change) |      |        | Description |
|-------------|--------------------------------|------|--------|-------------|
|             | XZ5                            | XZ54 | Tadmor |             |
| XLOC_053272 | -4.09                          | —    | —      | protein set |

— represents no change. NA represents unknown.

**Table S6** DEG up-regulated in both of XZ5 and XZ54

| Gene Id     | Log <sub>2</sub> (fold change) |      |        | Description                       |
|-------------|--------------------------------|------|--------|-----------------------------------|
|             | XZ5                            | XZ54 | Tadmor |                                   |
| XLOC_073621 | 3.94759                        | 3.80 | —      | cortical cell-delineating protein |

— represents no change.

**Table S7** DEGs down-regulated in both of XZ5 and XZ54

| Gene Id     | Log <sub>2</sub> (fold change) |       |        | Description                      |
|-------------|--------------------------------|-------|--------|----------------------------------|
|             | XZ5                            | XZ54  | Tadmor |                                  |
| XLOC_089282 | -2.73                          | -2.84 | -4.62  | caffeic acid o-methyltransferase |
| XLOC_036698 | -5.16                          | -4.21 | —      | histone h2a                      |
| XLOC_092820 | -4.58                          | -4.65 | —      | ---NA---                         |
| XLOC_071561 | -5.07                          | -6.02 | -4.86  | ---NA---                         |
| XLOC_067168 | -5.83                          | -4.31 | -3.51  | ---NA---                         |
| XLOC_049544 | -6.32                          | -5.01 | —      | ---NA---                         |
| XLOC_090528 | -5.85                          | -5.15 | -4.77  | predicted protein                |
| XLOC_093109 | -5.79                          | -6.07 | -5.33  | predicted protein                |

— represents no change. NA represents unknown.

**Table S8** DEGs only up- or down-regulated in Tadmor

| Gene Id                  | Log <sub>2</sub> (fold change) |      |        | Description                                                         |
|--------------------------|--------------------------------|------|--------|---------------------------------------------------------------------|
|                          | XZ5                            | XZ54 | Tadmor |                                                                     |
| <b>Metabolism</b>        |                                |      |        |                                                                     |
| XLOC_083676              | —                              | —    | -2.17  | s-adenosylmethionine decarboxylase                                  |
| XLOC_095268              | —                              | —    | -2.47  | stem 28 kda glycoprotein                                            |
| XLOC_034864              | —                              | —    | -2.80  | triacylglycerol lipase                                              |
| XLOC_082307              | —                              | —    | -3.21  | n- acetylneuraminylactose-wheat germ agglutinin isolectin complexes |
| XLOC_054295              | —                              | —    | -3.40  | gdsl esterase lipase at4g28780-like                                 |
| XLOC_073045              | —                              | —    | -4.18  | gdsl esterase lipase                                                |
| XLOC_073015              | —                              | —    | -4.22  | arginine decarboxylase                                              |
| XLOC_074328              | —                              | —    | -4.32  | rare lipoprotein a like double-psi beta-barrel containing expressed |
| XLOC_027571              | —                              | —    | -6.38  | glycosyltransferase protein 2-like                                  |
| XLOC_090724              | —                              | —    | -6.68  | snare-interacting protein keule                                     |
| XLOC_089757              | —                              | —    | -9.17  | caffeic acid 3-o-methyltransferase                                  |
| XLOC_037002              | —                              | —    | -5.07  | low-molecular-weight cysteine-rich protein lcr69 precursor          |
| <b>Stress defense</b>    |                                |      |        |                                                                     |
| XLOC_084723              | —                              | —    | 4.89   | dhn4                                                                |
| XLOC_051828              | —                              | —    | 2.74   | dehydration responsive protein                                      |
| XLOC_034696              | —                              | —    | -3.41  | lipid-transfer protein dir1-like                                    |
| XLOC_031430              | —                              | —    | -4.57  | pathogenesis-related maize seed protein                             |
| XLOC_070385              | —                              | —    | -5.83  | stress responsive protein                                           |
| <b>Transcription</b>     |                                |      |        |                                                                     |
| XLOC_022317              | —                              | —    | -3.60  | nuclease s1                                                         |
| XLOC_041687              | —                              | —    | -4.82  | transposon unclassified                                             |
| XLOC_067227              | —                              | —    | -3.50  | transposon protein precursor                                        |
| XLOC_041304              | —                              | —    | 3.03   | is1 transposase partial                                             |
| <b>Protein synthesis</b> |                                |      |        |                                                                     |
| XLOC_049399              | —                              | —    | 2.14   | 23s ribosomal rna                                                   |
| <b>Cell growth</b>       |                                |      |        |                                                                     |
| XLOC_063970              | —                              | —    | 2.31   | cell wall-associated hydrolase                                      |
| XLOC_057886              | —                              | —    | 3.56   | cell wall-associated partial                                        |
| XLOC_062551              | —                              | —    | -4.68  | cortical cell-delineating protein                                   |
| XLOC_059960              | —                              | —    | -6.00  | cortical cell-delineating protein precursor                         |
| XLOC_083214              | —                              | —    | -5.34  | keratin-associated protein 5-4-like                                 |
| XLOC_091007              | —                              | —    | -4.63  | root cap protein 1                                                  |
| XLOC_079375              | —                              | —    | -4.66  | root cap protein 1                                                  |
| XLOC_018231              | —                              | —    | -4.11  | root cap protein 1                                                  |
| XLOC_030829              | —                              | —    | -3.75  | root cap protein 1                                                  |
| XLOC_001464              | —                              | —    | 5.72   | muscle actin                                                        |
| <b>Transporter</b>       |                                |      |        |                                                                     |
| XLOC_034972              | —                              | —    | -5.50  | mate efflux family protein                                          |
| XLOC_030052              | —                              | —    | -5.06  | organic cation transporter                                          |
| <b>Unknown</b>           |                                |      |        |                                                                     |
| XLOC_062789              | —                              | —    | 8.72   | predicted protein                                                   |

| Gene Id     | Log <sub>2</sub> (fold change) |      |        | Description                            |
|-------------|--------------------------------|------|--------|----------------------------------------|
|             | XZ5                            | XZ54 | Tadmor |                                        |
| XLOC_057872 | —                              | —    | 4.23   | protein                                |
| XLOC_082234 | —                              | —    | 3.06   | hypothetical protein POPTR_1605s00200g |
| XLOC_026478 | —                              | —    | 2.67   | hypothetical protein                   |
| XLOC_023118 | —                              | —    | -4.37  | hypothetical protein F775_03747        |
| XLOC_092659 | —                              | —    | -4.10  | ---NA---                               |
| XLOC_031190 | —                              | —    | 2.27   | predicted protein                      |

— represents no change. NA represents unknown.

**Table S9** KEGG pathways of tolerance related root hair genes in response to drought stress

| Gene Id     | Log <sub>2</sub> (fold change) |      |        | Pathway                                                                                                                                                                    |
|-------------|--------------------------------|------|--------|----------------------------------------------------------------------------------------------------------------------------------------------------------------------------|
|             | XZ5                            | XZ54 | Tadmor |                                                                                                                                                                            |
| XLOC_013018 | 3.39                           | —    | 3.23   | Arginine and proline metabolism<br>Nitrogen metabolism<br>Alanine, aspartate and glutamate metabolism<br>Glyoxylate and dicarboxylate metabolism<br>Glutathione metabolism |
| XLOC_013896 | 3.68                           | —    | 3.68   | Selenocompound metabolism<br>Sulfur metabolism<br>Purine metabolism                                                                                                        |
| XLOC_019100 | 4.85                           | —    | -2.58  | Phenylpropanoid biosynthesis<br>Phenylalanine metabolism                                                                                                                   |
| XLOC_012656 | 2.5                            | —    | 2.72   | Glyoxylate and dicarboxylate metabolism                                                                                                                                    |

— represents no change.

## Text S1 Protein sequences used for alignment analysis in Figure 6.

### >HvEXPB7 (NCBI accession number KR732966)

MAAAFSSYSVAAAFLLCLAANGCCGCPWFLPATFCPEPTDPIPTDPAPATPPPALATPSPGSGSGSA  
NGSMGGWLDARATWYGAPDGAGPLDNGGACGFKNVNLPFNAMTSCGNEPIFKDGKGCSCYQ  
IRCVGKVHPACSGDPETVIITDMNYYPVARYHFDLSGTAFGAMAKDGRNDELRHAGIIDMQFKRVP  
CQYTGLSVTFHVEKGSNPNYLAILVEYGNLGDGVAQVDLMDGGEPTVSWRPMRESWGSIWRLDT  
RRPLRGPFSLRVTNGSGRSLVADQVIPADWQPDTVYSSDVQFDE

### >OsEXPB7 (UniProtKB accession number Q9LD07)

MAGRSRRRSFWSVGVAALLCLLAHGCsAKHHKPKPTPGGISGNASSSSNSSTPSIPPPVAPTPT  
APTPIPPSPGTGSSNGSSGGGGGGWLNARATWYGAPNGAGPDDNGGACGFKNVNLPFSAMTSC  
GNEPLFKDGKGCSCYQIRCVGHPACSGLPETVIITDMNYYPVSLYHFDLSGTAFGAMAKDNRND  
ELRHAGIIDIQFRRVPCQYPGLTVTFHVEQGSNPVYMAILVEYENGDDGDDVQVDLMESRYSTGGVD  
GTPTGVWTPMRESWGSIWRLDTNHPLQGPFSLRITNESGKTLIADQVIPADWQPNTVYSSIVQFD

### >ZmEXPB7 (NCBI accession number AAK56130.1)

MATTLSTVVVALGAPLFLLLVTCGSCARPVSFNASDLTADPGWDAARATWYGAPTGAGPDDDDGG  
ACGFKNVNLPFSAMTSCGNEPLFKDGKGCSCYQIRCQNHPCSGNPETVIITDMNYYPVAKYHF  
DLSGTAFGAMAKPGRNDELRHAGIIDIQFKRVPCNYPGQKVTTFHVEEGSNPVYFAVLVEFEDGDGD  
AVQVDLMEANSASWTPMRESWGSIWRLDSGHRILTAPFSLRITNESGKTLVADHVIPANWVPNTYY  
RSIVQY

### >TaEXPB7 (NCBI accession number AAS48884.1)

MAGLLSVKAFALAAVLAAYVSCAAAEQPGAADLDASAVSYSSAWLPARATWYGAPNGAGPDD  
NGGACGFKHVNYYPFSSMTSCGNQPLFKDGKGCSCNQIRCSGDKSCSGKIETVMITDMNYYPVA  
QYHFDLSGTAFGALAKSGLNEKLRHSGIIDIQFRRVPCNFPGLKINFHVVDGNSAVYLAVLVEYED  
MDGDVIQVDMKEANSWSWTPMRESWGSIWRLDMSNHRLQGPFSMRITSDSGKLVANNVIPANWR  
PNTDYRSFVQFS

**Text S2 Protein sequences used for phylogenetic tree analysis in Figure 7a.**

**>HvEXPB7 (NCBI accession number KR732966)**

MAAAFSSYSVAAAFCLLLAANGCCGCPWFLPATFCPEPTPDPIPTDPAPATPPPALATPSPGSGSGSANGSMGGWLDARATWYGAPDGAGPLDNGGACGFKNVNLPFNAMTSCGNEPIFKDGKGCSCYQIRCVGKVHPACSGDPETVIITDMNYYPVARYHFDLSGTAFGAMAKDGRNDEL RHAGIIDMQFKRVP CQYTGLSVTFHVEKGSNPNYLAILVEYGNLGDGVAQVDLMDGGGEPTVSWRPMRESWGSIWRLDTRRPLRGPFSLRVTNGSGRSLVADQVIPADWQPDTVYSSDVQFDE

**>TaEXPA1 (NCBI accession number AAR27327.1)**

MAAAGALFFLFSSFCLLARQAAAGGYGGWQSAHATFYDGGDASGTMGGACGYGNLYSTGYGTNTAALSTALFNDGAACGSCYELRCDNAGSSCRPGSILVTATNFCPPNYGLPSSDGGWCNPPRPHFDM AEP AFLHIAQHRAGIVPVYRRVPCVKKGGIRFTINGHSYFNLVLTNVAGAGDARSVSIKGTTRTGW QAMSRNWGMNWQSN TFLDGQCLSFRVTSSDGRVT SNAAAPAGWHFGQTFEGAQF

**>TaEXPA2 (NCBI accession number AAS48871.1)**

METRRPAVSTVSVGAVVLILAWSPA AVASGGWMDAHATFYGDETGAETMQGACGYGNLFQQGYGLDTTALSVALFSDGWSCGGCYEIQCHGDPHCKPGGAQVTVTATNLCPANYSKPYENWCNPP LKH FDSLKPMFLRLVTDHFVGIIPVQYRRVPCAKKGGIRIEMTGNQYWVGVLFVNVAGPGEVKVLAVK GAKDGQWRNMKRNWGWQIWDGHVQNLVGGLSFRVVASDGRSVVLDGVPASWTIGQSFEGKQF

**>TaEXPA3 (NCBI accession number AAS48872.1)**

MASANALLLFSAAFCLARRAAGGYGSWQSAHATFYGGDASGTMGGACGYGNLYSSGYGTN AAALSTALFNDGAACGSCYELKQEVSSSCLPGSITITATNLCPNYALPNDERGWCNPPRAHFDM AEPAYLQIGIYRAGIVAVAYRRVPCVKKGGIRFTINGHSYFNLVLTNVAGAGDVQSVAIKGYSTGW QAMARIWQONWQSNADLDGQSFSFRVTFSDGRVT SNNAAPAGWSFGQTFEGAQF

**>TaEXPA4 (NCBI accession number AAS48873.1)**

METPSLLLFTLLAFAFKASVAQWTPAFATFYGGSDASDTMGGACGYGNLYNAGYGVNSAALSTALFNNGASCGMCFITCDASKTPSCKQGT SITITATNFCPPNYALASDNGGWCNPPRQHFDMSQPAW ETIAVYQAGIVPVNYRRVPYQRS GGMRF TINGNDYFELVTVANVGGSGVVSQM WIKGFKTDWMV M SRNW GASWQSNAYLNSQ SISFRVQTDDGRVITADNVAPYNWWFGGTYTSWQQF

**>TaEXPA5 (NCBI accession number AAS48874.1)**

MAVIKMLLLPALFALLRAASAAQWTPAHATFYGGDASGTMGGACGYGNLYGAGYGTQTTALS TALFNNGASCGACFTIACDTRKSRMCKPGTSITV TATNFCPPNYALAGDNGGWCNPPRQHFDMAQ PAWETIAVYKAGIVPVNHRRVRCQRS GGIRFTINGHSYFELVLTNVGGSGGVAQM WIKGSRTNW MEMSRNWGANWQSNAKLDGQSL SFRVKSDDGRVVTANDVAPPGWWFGGTYTSGAQLY

**>TaEXPA6 (NCBI accession number AAS48875.1)**

MAAGMRFLQLFAAVLAFCFVQARS DYWHQAYATFYGGADGAETMGGACGYDNL YAAGYGLNN AALSTVLFNNGLSGQCYLITCDTSKSNMCKPGTSITVSATNLCPNWALANDNGGWCNPPREHF DMSQPAWENLAIYRAGIVPVLYQRVACQRQGLRFTMSGFN YFELVLTNIAMSGSIRSMSVKGTN TAWITMSQNWGANWQCLAGLKGQALSFGITSSGGQYKVFQDVVPAWWLFGQTFSTWQQFDY

**>TaEXPA7 (NCBI accession number AAS48876.1)**

MAPPLILLVVFLPALAAGHQHPSSYGSSALSEWRNAKSSYFAADPGDAIGGACGFGDLGKHGYG MATVGLSTALFERGAACGGCYEVKCVEDLKYCLPGTSIVVTATNFCPPNYGFPADAGGVCNPPNH HFLLP IQAFEKIALWKAGVMPIQYRRVKCLREGGVRFSVSGKSFFFTVLISNVGGAGDVRSVKIKGT ESGWLD MGRNWGQIWHINLDTGQPV SFELTSSDGTTMTNFNVV PKDWEFGKTYTGKQFLL

**>TaEXPA8 (NCBI accession number AAS48877.1)**

MEFLGLLALAIAMVGVVAGDDSTWSNGRATFYGGNDASGTMGGACGYGNMFSAGYGTNTAAL  
STALFNNGQSCGACFEIRCAGSGSCLPGSAVVTATNLCPANYALPNNEGGWCNPPQSHFDLAEMPF  
TKIAQARAGVVPVQYRRVVCVKTSGIRFTITGHSYFNLVLITNVAGAGDLTAVYVKSPTGWLTMS  
HNWGANWQNGAMLNGQPLSFRVTTSDGRTTTSNNVAPSGWSFGQTYAGSQF

**>TaEXPA9 (NCBI accession number AAS48878.1)**

MAAAMPSPALLAALLLVTLSPAAARVPGVYTGGDWQSAHATFYGGTDASGTMGGACGYGNL  
YSQGYGVNNAALSTALFNEGQRCGACFEIRCVNQPGWAWCLPGRPSIVTATNFCPPNYALPSDDG  
GWCKPPRPHFDLAMPFLHMAQYRAGIVPVSYRRVACRKS GGVRFRTINGFRYFNLVLITNVAGAG  
DLVRASVKGSSGTWMPMSRNWQNWQSNAILVGQALSFRVTASDRRTSTSWNAAPQNWRFGR  
FEGKNLRV

**>TaEXPB1 (NCBI accession number AAS48879.1)**

MAPLSSKAVALVALFSLLVTYAAGAGNFNDSAFTADPNWEDARATWYGAPTGAGPDDDGGACGF  
KNTNQYPFSSMTSCGNEPIFKDGKGCSCYQMRCTNDQSCSGNPETVVITDMNYYPVAKYHFDLS  
STAFGAMAKPGLSEKLRHSGIIDIQFKRVPCEFPGLKVTFHVEQGSNPVYFAVLVEYEDGDGDVVQ  
VDLMEANSGTWTPMRESWGSIWRLDSGHRLQAPFSMRITNESGKTLVADKVIPANWAPSTFYRSIV  
QYS

**>TaEXPB2 (NCBI accession number AAS48880.1)**

MGSLPLAVLAALLCCFLAVGGGAVELNTDPSFPDVLNATDATKYWGPWTPARATWYGQPNGA  
GPDDNGGACGFKHTNQYPFASMTSCGNQPLFKDGKGCSCYKIRCRKDMSCSGRTETVIITDMNY  
YPVAPFHFDLSGTAFGRLAKPGLNDRLRHSGIIDIEFTRVPCEFPGLKIGFHVEEYSNPVYFAVLVEY  
EDGDGDVVQVDLMESRPGGGKWTRMRESWGSVWRLDSNHRLQAPFSIRIRNESGKTLVANKVI  
PANWRPNTFYRSFVQYS

**>TaEXPB3 (NCBI accession number AAS48881.1)**

MAPLSSKAVALVALFSLLVTYAAGAGNFNDSAFTADPNWEDARATWYGAPTGAGPDDDGGACGF  
KNTNQYPFSSMTSCGNEPIFKDGKGCSCYQIRCTNDQSCSGNPETVVITDMNYYPVAKYHFDLSG  
TAFGAMAKPGLSEKLRHSGIIDIQFKRVPCEFPGLKVTFHVEQGSNPVYFAVLVEYEDGDGDVVQV  
DLMEANSGTWTPMRESWGSIWRLDSGHRLQAPFSMRITNESGKSLVADKVIPANWAPSTFYRSIVQ  
YS

**>TaEXPB4 (NCBI accession number AAS48882.1)**

MASSSSVLLVAAVLAAVVCGAHGIAKVPPGNITASPTS YGNKWLD AKTTWYGKPTGAGPKDNG  
GACGYKEVDKAPFHGMTSCGNIPIFKDGRGCGSCFELKCTKPEACSGEPTMVTITDKNEEPIAPYH  
FDLSGHAFGSMAKKGEEQKLRDAGEVEIKFRRVKCKYPAGTKVNFHVEKSSNENYLALVIKFLQG  
DGDVVGVDIKQKGEDKWTELNESWGAVWRIDTPHKLIGPFSVRYTTEGGTKTVVDDVIPKGWKP  
DTSYEAKGGY

**>TaEXPB5 (NCBI accession number AAS48883.1)**

MGSVSYVPAAVLAALVSGGACIPSVPPGNITTNYNNQWLPAKATWYGKPTGSGPKDNGGACGI  
KDVNLAPYNGMIACGNVPIFKDGKGCSCHEIKCQKPSPCSDKPVITIFITDKNYEPIAPYHIGLSGT  
AFGAMATPGKEQTLRSFGELELQFRRVRCKYAPGKTFHVEKGSNPNYLAVLVKFSDDGDVVQ  
MDIQESKSPAWIPLTSLWGAIWRWDGAKPLKGPFSIRVTSEPGKLLIAKDVIPANWKADTVYTSNV  
QF

**>TaEXPB7 (NCBI accession number AAS48884.1)**

MAGLLSVKAFALAAVLAAYVSCAAAEQPGAADLDASAVSYSSAWLPARATWYGAPNGAGPDD  
NGGACGFKHVNQYPFSSMTSCGNQPLFKDGKGCSCNQRCSGDKSCSGKIETVMITDMNYYPVA  
QYHFDLSGTAFGALAKSGLNEKLRHSGIIDIQFRRVPCNFPGLKINFHVVDGNSAVYLAVLVEYED  
MDGDVIQVDMKEANSWTPMRESWGSIWRLDSNHRLQGPFSMRITSDSGKLLVANNVIPANWR



PNTDYRSFVQFS

>**TaEXPB8 (NCBI accession number AAS48885.1)**

MAGVSTNAIALVLVTLLSVLVTSVRSAAANYDTAAARSYNSGWLPKATWYGAPTGAGPMDNGGA  
CGFKNVNKYPFSSMTSCGNEPLFDGGAGCGSCYEIRCAANNPSCSGQPRTVVITDMNYYPVARYH  
FELSGTAFGAMAKYGLNDKLRHAGIIDMQFRRVRCNFPGMKVTFHVQRGSNPNYLAVLVEYANID  
GTVVRMELMQTRNGRPTGSWEPMRRSWGSIWRMDTSRPLQGPFSMRITSDSGKTLVANNVIPAY  
WRPDNAYWSNVQFY

>**TaEXPB9 (NCBI accession number AAS48886.1)**

MAKTCTLALLGALLVLSLLVSPACSRKLAKEVGGHDKSAPVKGHKNQTTTNPSSSAAYGGGWLPA  
GATYYGNPNNGDSDGGACGYQTAVGHRPFSSMIAAGSSPLFMAGKGCACGYDVKCTSNSACSGK  
PVNIVITDLSPGNLYPGEPCFHDMSGTALGAMAKPGMADKLRAGGVIRMQYKRVPCCKYPGVNI  
RVDQGSNPFYFKTLIEFEDDDGDLKAVALKEAGSGAWTPMAQDWGALWRLNEGRQLRAPFSLRL  
TSDSGRKLVSINVIPANWKAGATYRSLVNY

>**TaEXPB10 (NCBI accession number AAS48887.1)**

MAGVSSNAIAFVALLSVLFTGVRSAVNYDTAVARSYNSGWLPKATWYGAPNGAGPDDNGGACG  
FKNVNQYPISSMGACGNEPIFAGGEGCGMCYEIKCDYSNPNPSCSGQPRRIVITDMNYYPVARYHLD  
LSGTAFGSMARYGLNDRLRHAGIIDMQFRRVPCNFPGMKVTFHVQRGSNPNYLAVLVEYANVDGT  
VVRMELMQTINGRPTGYQDMRRSWGSIWRMDTNRPLQGPFAIRITSDTGKTLVANNAIPAYWQP  
DHAYWSNLQFY

>**OsEXPA1 (UniProtKB accession number Q7XWU8)**

MGGACGYGDLYSTGYGTNTAALSTVLFNDGASCGQCYRIMCDYQADRRFCISGTSVTITATNLCPP  
NYALPNDAGGWCNPPRQHFDMAPAWLKIGVYVGGIVPVMYQRVPCAKQGGVRFINGRDRYFEL  
VLVSNVGGVGSIQSVSIKGSRTGWMAMSRNWGVNWQSNAYLDGQSLSFKVTSSDGQTLTFLDVAP  
AGWTFGQTFSTSQQFS

>**OsEXPA2 (UniProtKB accession number Q40636)**

MASRSSALLLFSAFCLARRAAADYGSWQSAHATFYGGGDASGTMGGACGYGNLYSTGYGTNT  
AALSTVLFNDGAACGSCYELRCDNDGQWCLPGSVTVTATNLCPPNYALPNDGGWCNPPRPHFD  
MAEPAFLQIGVYRAGIVPVSYRRVPCVKKGGIRFTINGHSYFNLVLTNVAGPGDVQSVSIKGSSTG  
WQPMSRNWQNWQSNAYLDGQSLSFQVAVSDGRTVTSNNVVPAGWQFGQTFEGGQF

>**OsEXPA3 (UniProtKB accession number Q40637)**

MLSGMEKQPAMLLVLTLCFAACKXSVAQSAFATFYGGKDGSCGTMGGACGYGNLYNAGYGLYN  
AALSSALFNDGAMCGACYTITCDTSQTKWCKPGGNSITITATNLCPPNWALPSNSGGWCNPPQHF  
DMSQPAWENIAVYQAGIVPVNYKRVPCQRSGGIRFAISGHDFELVTVTNVGGSGVVAQMSIKGSN  
TGWMAMSRNWGANWQSNAYLAGQSLSFIVQLDDGRKVTAWNVAPSNWFFGATYSTSWVQF

>**OsEXPA4 (UniProtKB accession number Q0DHB7)**

MAIAGVLFLFLARQASAAGYGGWQSAHATFYGGGDASGTMGGACGYGNLYSQGYGTNTAALS  
TALFNDGAACGSCYELRCDNAGSSCLPGSITVATNFCPPNYGLPSDDGGWCNPPRPHFDMAEPAF  
LHIAQYRAGIVPVSFRRVPCVKKGGVRFVNGHSYFNLVLTNVAGAGDVRVSVSIKGSRTGWQPM  
SRNWGQNWQSNAYLDGQSLSFQVAVSDGRTVTSNNVAHPGWQFGQTFEGGQF

>**OsEXPA5 (UniProtKB accession number Q6ZGU9)**

MSSRRDVLAVVLVAALLPPALSRGLWLGHGHLGHGHRWRAPHVGGHGQGQGPQQAHLGGGG  
WSSAHATFYGGGDASGTMGGACGYGNLYSQGYGTNTAALSTALFNGLSCGACFEVRC DAGGG  
GSHSCLPGSVVTVATNFCPPNALSDDGGWCNPPRAHFDMSQPVFQRIALFKAGIVPVSYRRVAC  
QKKGIRFTINGHSYFNLVLTNVGGAGDVHAVAVKSERSAAWQALSARNWQNWQSAALLDGGQ  
ALSFRVTTGDGRSVVSNNAVPRGWSFGQTFSGAQFN

>**OsEXPA6 (UniProtKB accession number Q9M4X7)**

MAPLLLLLASLLLVAARRALGLGLGQWQPGHATFYGGGDASGTMGGACGYGNLYSQGYGTSTA  
ALSTALFNRGLSCGSCYELRCAGDHRRSCLPGGATVTVTATNFCPPNYALPSDGGGWCNPPRRHFD  
LAEPAFLRIARHAAGIVPVSFRRVACARKGGVRFVNGHAYFNLVLTNVGGAGDVRS LAVXGSGS  
GSRVGGRWQPMSRNWGQNWQSNAYLDGKALSFRV TAGDGRSLTCADVAPAGWQFGQTFEGRQF  
>**OsEXPA7 (UniProtKB accession number Q852A1)**

MSPAPRVLVLVVATVVALQVSPAAGRIPGAYGGGEWQSAHATFYGGSDASGTMGGACGYGNLYSQ  
GYGVNNAALSTALFNSGQSCGACFEIKCVNQPGWEWCHPGSPSILITATNFCPPNYALPSDNGGWC  
NPPRPHFDLAMPFLHIAEYRAGIVPVSYRRVPCRKKGGVRF TINGFRYFNLVLTNVAGAGDIVRA  
SVKGTSTGWMPMSRNWGQNWQSNVSVLVGQALSFRV TGS DRRTSTSWNAAPAGWHFGQTFEGKN  
FRV

>**OsEXPA8 (UniProtKB accession number Q9XHX0)**

MAAARMLVLLASL CALLLTASAAKWTPAFATFYGGSDASGTMGGACGYGDLYGAGYGTRTAALS  
TALFNGGASCGACFTIACDTRKTQWCKPGTSITV TATNFCPPNYALSGDAGGWCNPPRRHFDMSQP  
AWETIAVYRAGIVPVNYRRVPCQRSGGIRFAVNGHSYFELVLTNVGGSGAVAQMWIKGSGTGWM  
AMSRNWGANWQSNARLDGQALSFRVQADDGRVVTAA DVAPAGWSFGATYTSSAQFY

>**OsEXPA9 (UniProtKB accession number Q4PR53)**

MEKLLLVFLSLCCASRLRGEAAQWTSATATFYGGSDASGTMGGSCGYGNMYSAGYGTNTTA  
LSSALYGDGASCGACYLVTC DASATRWCNGTSVTVTATNYCPPNYSESGDAGGWCNPPRRHFD  
MSQPAWEAIAVYSSGIVPVRYARTPCRRVGGIRFGIAGHDYYELVLTNVAGSGAVAAWVKGSGT  
EWLSMSRNWGENWQSNAYLTGQALSFRVQADDGGVVTAYDVAPANWQFGSTYQSDVNFSY

>**OsEXPA10 (UniProtKB accession number Q7XUD0)**

MAPCLLVLFLLPALATGHQHPSTLGSSALSEWRS AKASYAADPEDAIGGACGFGDLGKHGYGM  
ATVGLSTALFERGAACGGCYEVKCVDDLKYLCPGTSIVVTATNFCAPNFGLPADAGGVCNPPNHH  
FLLPIQSF EKIALWKAGVMPIQYRRVNCLRDGGVRF AVAGRSFFLTVLISNVGGAGDVRSVKIKGTE  
SGWLSMGRNWGQIWHINSDFRGQPLSFELTSSDGKTLTNYNVVPKEWDFGKTYTGKQFL

>**OsEXPA11 (UniProtKB accession number Q4PNY1)**

MELLRLLAVA AVAAMA AEVAAGGDSGWSSGSATFYGGSDASGTMGGACGYGNLYSAGYGTSTAA  
LSTALFNNGQSCGACFEVRCGGG SCLAGTVAVTATNL CPPNYALAGDAGGWCNPPRPHFDMAEP  
AFTRIAQARAGVVPVQYRRVACAKQGGIRFTITGHSYFNLVLTNVGGAGDVTAVSVKGSRS GWQ  
AMSHNWGANWQNGANLDGQPLSFRV T ASDGRTV TSDNVAPSGWSFGQTFSGGQF

>**OsEXPA12 (UniProtKB accession number Q7G6Z2)**

MARSAFFHCVA AVAACIAATAAALSGTATFYGGSDASGTMGGACGYGNLYSTGYGTNTAALSSA  
LFNDGAACGECYQITCDQSNKWKAGTSVTITATNL CPPDYSKPSNDGGWCNPPRQHFDMAQPA  
WEQIGVYRGGIVPVNFQRV SCTRKGGVRF TINGNSYFELVLTNVGGPGSIKSVQIKGTKTGWVTM  
SRNWGANWQANNYLNNQAISFSVTSTAGKTLVFEDVAPSNWQFGQTF TSGVQFY

>**OsEXPA13 (UniProtKB accession number Q4PR52)**

MAGVARMLAAVVC AIMPAAAMAAGGVGALEPSGWVRAHATFYGGADASGTMGGACGYGNLYA  
QGYGTRTAALSTALFNDGLACGQCYKLVCDRKTDR TWCKPGVSVTITATNFCPPNWDLPSDSGGW  
CNPPRPHFDMAQPAWEKIGIYRGGIIPVIYQRVPCMKKGGVRF TINGHDYFQLVLLTNVGAAGSIKA  
MDVKGSKSPDWMAMAHNWGAQWHS LAYLTGQGLSFRV TITDGQTLVFPNVVRPGWRFGQTFAS  
NIQFK

>**OsEXPA14 (UniProtKB accession number Q4PR51)**

MASSPRAFALVFFAIAAVGCTQLTTADDAAPPVWQKAHATFYGGADASGTMGGGCGYGDLYSQG  
YGTRNAALSTALFNDGASCGQCYKIACDRKRAPQWCKPGVTVTITATNFCPPNWDLPSDNGGWC  
NPPRPHFDMAQPAWEKIGIYSAGIIPVIYQRVPCIKKGGVRF TINGHDYFNLVLTNVATTGSIKSM  
IMGSNSTDWMPMVRNWGANWHSLSYLTGQTL SFRVTNMDGQTLVFKNIVPSGWKFGQTF TSKLQ

FK

**>OsEXPA15 (UniProtKB accession number Q4PR50)**

MAMWKKKKTPSILPLVVVIAAASLIAPT TAGWSSGTATFYGGSDASGTMGGACGYGNLYWSGYG  
TNTAALSSALFNDGASCGQCYQIACDHQAEPRWCLQGRVTITGTNLCPPNYALSSNDGGWCNPP  
RTHFDMAEPAWLQIGIYKAGIVPVLYQRVPCVKQGGVRFMTGGFNYPFELVLISNVAGSGSIQSVVW  
KGPNTDRMPLSRNWGANWQSHAGLVGQTLTFGVTSTGGQTLVFQNIWPAWWKFGQSFSSNLQFS  
Y

**>OsEXPA16 (UniProtKB accession number Q69XV9)**

MSSVLLFLLLLLLSGVSLSGCIRLGGSGYEEWRMGSATYIKESLGHPLNDGGGACGYGDLDFRYG  
RYTAGVSGALFGRGSACGGCYEVRVCVNHVLWCLRGSPVTVVTTATDFCAPNLGLSDDYGGWCNFP  
KEHFEMSEAAFLRVAKAKADIVPVQFRRVSCDRAGGMRFTITGGASFLQVLITNVAADGEVAAVK  
VKGSRTGWIPMGRNWGQNWQCDADLRGQPLSFEVTGGRGRTVVAYSVAPPDWMFAQTFEGKQF  
VE

**>OsEXPA17 (UniProtKB accession number Q4PR49)**

MASSWNNPAIFLAAALAVATAAQVV TAGFTTDLYWQQPAPGAVTPYKTSWDHDSATFYGDPSG  
MGDDFGGACGYVSNDIVSLYSTKTAALSTPLFADGNGCGQCYELRCVKSPWCNPGSPSVVITGTN  
LCPPNWYLPNDGGWCNPPRHFDMAAPP SFLKLAQRVAGIVPVQYRRVPCQRTGGVRFCLQGNH  
YWLLLYVMNVGGAGDVSSLSVKTSGGGGAWIQAAHNWGITYQVFAALDNSDGLTVKLTITYSTPQ  
QTIIVSDAISPWWITGLCYQGSNNFY

**>OsEXPA18 (UniProtKB accession number Q4PR48)**

MGNIVLQLLAILALCIAPARSGWLQGTATFYGGADGSGTMGGACGYGNLYDQGYGINNAALSTPL  
FNNGASCGQCYLIICNYDKAPSGCRMGTAITVTGTNFCPPNYDLPYGGWCNTRPHFDMSQPAWE  
NIGIYSAGIVPILYQQVKCWRSGGVRFTITGLNYFELVLVTNMAGSGSIASMSVKGSSTGWIQMSRN  
WGANWQCLAGLAGQALSFTVTSTGGQTI VFDSVVPAGWSFGQTFSTYQQFDY

**>OsEXPA19 (UniProtKB accession number Q7G6Z5)**

MGNIFLQLLAVVALCIAPARSDWLPGTATFYGGADGSGTMGGACGYGNLYDQGYGINNAALSTPL  
FNDGASCGQCYLIICDYKAPDWCKLGKAITVTGTNYCPPNYDLPYGGWCNATRPHFDMSQPAW  
ENIGIYNAGIIPILYQQVKCWRYGGVRFINGFNYPFELVLVTNMAGSGSIASMSVKGSCTGWIQMTR  
NWGANWQCLAGLAGQALSFNVTSTGGQTI VFDDAVPAGWSFGQTFSTYHQFDY

**>OsEXPA20 (UniProtKB accession number Q10RK1)**

MGNILLQLLAVVALCIAPARSDWLPGTATFYGGADGSGTMGGACGYGNLYDQRYGINNAALSTPL  
FNDGASCGQCYLIICDYKAPDWCKLGKAITVTGTNYGGWCNATRPYFDMSQPAWENIGIYSAGI  
VPILYQQVKCWRYGGVRFIINGFNYPFELVLVTNMPGSGSIVSMSVKGSCTGWIQMTRNWGANWQ  
CLAGLAGQALSFNVTSTGGQTI VFDDAVPAGWSFGQTFSTYHQFDY

**>OsEXPA21 (UniProtKB accession number Q10KN4)**

MAPPSLPILLVLLSLSSSLSSSSAAAAGRWTDAHATFYGGADASGTMGGACGYGNTYGGYGTDT  
AALSAVMFGDGLSCGACFELRCGGGGGDRRGCLPPAAGKSIVVTATDLCPANHALPGDRGGWC  
NPPLHHFDLSQPAFLRIARFQSGIVPVSYRRVACRRKGGMRFTINGHSYFNLVLSNVGGAGDVHA  
VAVKAGGGRKARWQAMARNWGQNWQSGALLDQALSFTVTTGDRRSVVSYNVAPAGWAFGQT  
FTGRQFT

**>OsEXPA22 (UniProtKB accession number Q4PR44)**

MAPARPFALLFLAVTVGFVLLTAADDSANATATTTTAMAPSSSTDDAAPPVWLKAHATFYGGADA  
SGTMGGACGYGDLYSQYGTRNAALSTALFNDGASCGQCYKIACDRKRAPQWCRPGVTVTITAT  
NFCPPNWDLPDNGWCNPPRPHFDMAQPAWEKIGIYRAGIIPVIYQRVPCVKKGGVRFINGHDY  
FNLVLVTNVATTGLIKSMDVMGSNSTDWLPMVRNWGANWHSLSYLTGQMLSFRVTNMDGQTLV  
FRNIVPSGWKFGQTFASKLQFK

**>OsEXPA23 (UniProtKB accession number Q4PR43)**

MAPARAFVLVLLAVASASTAAANTATTTPTNPVAAPTQWQKAHATFYGGADASGTMGGACGYGN  
LYSQGYGTRNAALSTALFNDGASCGQCYKIACDRKRAPQWCKPGVTVTITATNFCPPNWNLPSDN  
GGWCNPPRPHFDMAQPAWEKIGVYSAGIIPVIYQRVPCVKKGGLRFTINGHDYFQLVLVTNVAAG  
SIKSMEVMGSNTADWMPMARNWGAQWHSLAYLTGQGLSFRVTNTDDQTLVFTNVVPPGWKFGQ  
TFASKLQFK

**>OsEXPA24 (UniProtKB accession number Q4PR42)**

MADMAPARALALVLLAVAVGSALMAAAQDAPSPPTMAPSPSTDETPPVWLKAHATFYGGADAS  
GTMGGACGYVDLYSQGYGTRNAALSTALFNDGASCGQCYKIACDRKRAPQWCKPGVTVTVTAT  
NFCPPNWNLPSDNNGWCNPPRPHFDMAQPAWEKIGIYRAGIIPVMYQRVPCVKKGGVRFINGHD  
YFNLVLVTNVATTGSIKSMDIMGSNSTDWMPMVRNWGANWHSLSYLTGQMLSFRVTNMDGQTL  
VFRNIVPSGWKFGQTFASKLQFK

**>OsEXPA25 (UniProtKB accession number Q4PR41)**

MEYAILFATSLVITVLAASGFAPAAGWNKGTATFYGGADASGTMGGACGYGNLYTAGYGTNTAAL  
SSVLFNDGWSCGQCYLIMCDAATPQWCRAGAAVTITATNLCPPNWALPSNSGGWCNPPRPHFDM  
AEPAWLQIGIYKAGIIPVLYQQVKCWRQGGIRFTMGGFNFFELVLVSNVAGSGSVRSVSVKGGSTG  
WITLNRNWGANWQCNSGLVGQALSFAVTSTGGQTLIYINVVPSWWSFGMTFTSNQQFSY

**>OsEXPA26 (UniProtKB accession number Q2QP13)**

MAPLPLTTTSLLLFFFLASSFAADV VVAGGGGGGGGYDGGGDGEGGGGGDGEAGGGGGGAKM  
PHVNHGRYKCGPWVDGHATFYGGRDASGTTEGGACGYKDADGYGAMTAAVSPALFDNGAGCG  
ACYELKGDGKTVVVTATNQAPPVNGMKGEHFDLTPAFLSIAEEKLGVPVSYRKVACVRQGG  
IKYTITGNPSYNMVMVKNVGGAGDVVKTIVKGTKRKVTPLQRSWGQLWKTEANLTGESLFRV  
MTGDHRKATSWRVAPRDWTYDNTYQAKKNF

**>OsEXPA27 (UniProtKB accession number Q7XE35)**

MGAMAENLLVLCITLAARMALAAADDWIPATATFYGGNDGSGTMGGACGYGNLYDQGYGLENA  
ALSTALFNDGAACGQCYLIVCDTDKAGRWCPRGAVTVTATNLCPPNWALPSDGGWCNPPRRH  
FDMSQPAWERIGVYRAGIVPVLYRRVRCWRRGGVRFVGGFDHFELVLVANVAGSGSVAASVRG  
AGTGWLQMSRNWGANWQSLAGLAGQPLSFGVTTTGGQYILFQDVAPAGWKFGQTFSTSKQFDY

**>OsEXPA28 (UniProtKB accession number Q4PR40)**

MVIRFFAVLAAALCITSASAAAAGGWVSGTATFYGGK DASGTMGGACGYGNLYTQGYGVYNAAL  
STALFNGGASCGQCYLIMCDASKTPEWCKAGTAVTITATNLCPPNWALANDDGGWCNPPRPHFDM  
SQPAWETIGIYRAGIVPVLYQQVKCWRQGGVRFVSGFNIFELVLITNVAGSGSVQAMSVKGSKTG  
WIPLARNWGANWQCNSALVGQALSFRVTSTGGQTLQINSVPEWWEFGTTFTSNQQFDY

**>OsEXPA29 (UniProtKB accession number Q4PR39)**

MARRGHVFAVFAVSYALLAAASTTVEAFAASGWSKGTATFYGGSDASGTMGGACGYGNLYTQG  
YGTRTAALSTALFDDGASCGQCYALTCDARADPRWCAGASVTVTATNFCPPNYALPSDDGGWCN  
PPRPHFDMAQPAWERIGVYRGGIVPVAFRVPCRRRGGVRFVAGRDYFELVLVTNVAAGSVRS  
MEVRGSRRGAGWMAMSRNWGANWQSLAYLDGQGLSFRVTATDGTIVFAGVPPSWRFGQTFE  
STQQFM

**>OsEXPA30 (UniProtKB accession number Q8W2X8)**

MAAASSTTATTAILAAVIISLAGAATTVDKFRAMQWTPAHATFYGDETA SETMGGACGYGNLYAS  
GYGTDTAALSTTLFKDGYGCGTCYQMRCVGTASCYRGSPAITVTATNLCPPNWAEDPDRGGGGW  
CNPPRAHFDLSKPAFMRMADWRAGIVPVMYRRVPCARAGGLRFALQGNPYWLLAYVMNVAGAG  
DVGDMWVKAGGGGGWVRMSHNW GASYQAFALGGQALSFKVTSYTTGQTLAAGVTPASWCF  
GLTYQARVNF

**>OsEXPA31 (UniProtKB accession number Q75I75)**

MAMSSRLALCLAVVAACAAGGAVADWSPATATFYGGSDGSGTMGGACGYGNLYDQGYGVDNAA  
LSQALFNDGASCGQCYLIVCDTSRAPQWCKAGTAVTVTATNLCPPNWALPSDGGGWCNPPRPHFD  
MSQPAWEQIGVYQAGIVPVLYQVRRCWRQGGVRFVAGLNYFELVLITNVAGSGSVASAWIKGTN  
TGWIQMSRNWGANWQSLAGLAGQALSFAVTTTGGQYLQFDVAPAWWQFGQTFSTYQQFDY

>**OsEXPA32 (UniProtKB accession number Q6YYW5)**

MWCTWALGRVVLAUVFLVALAAGDAAPPKVHRNHGKFTAGPWKQAHATFYGGRDGSGLTDGAC  
GYKDTSTKEGYGVQTVAVSTPLFGAGAGCGACYEVKCVDSPDGCKVGAAPLVVTATNLCPPNPGQS  
NDNGGWCNPPREHFDLSMPAFLQIAQEKAGIVPISYRRVPCVKVGGIRYTITGNPYFNLVMVSNVG  
GAGDVAGLSVKGNKRVKWTPLKRNWQEWQTSEVLTGESLTFRVMTGDHRKATSWHVLPPDWQ  
FGVTYQATKNFN

>**OsEXPA33 (UniProtKB accession number POC1Y4)**

MAMPVVQVLLLCALAYQAVDAQWTPATATFYGGSDGAGTMGGACGYGNLYNAGYGLNNAALSS  
ALFNDGAMCGACYTIACDTSQSTWCKPGTSITITATNLCPPNYAKKSDAGGWCNPPRKHFDMSQP  
AWTSIAIYQAGIVPVNFKRVPCQKSXGIRFTISGRDYFELVTVFNVGGSGVVAQVSIKGSKTDWMA  
MSRNWQONWQSNAYLNTQSLSFVKVLLDDAREVTVWNIAPSNWNFGTTYTSNINF

>**OsEXPB1 (UniProtKB accession number Q40638)**

MASSSLLACVVVAAMVSAVSCGPPKVPPGNITTSYGDKWLEAKATWYGAPKGAGPKDNGGAC  
GYKDVDKAPFLGMNSCGNDPIFKDGKCGSCFEIKCSKPEACSDKPALIHVTDMNDEPIAAYHFDL  
SGLAFGAMAKDGKDEELRKAGIITQFRRVKCKYPADTKITFHIEKASNPNYLALLVKYVAGDGD  
VVEVEIKEKGSEEWKALKESWGAIWRIDTPKPLKGPFSVRVTTEGGEKIIAEDAIPDGWKADSVYK  
SNVQAK

>**OsEXPB2 (UniProtKB accession number O24230)**

MAGASAKVVAMLLSVLATYGFAGVYVYVYNDWLPAKATWYGQPNGAGPDDNGGACGFKNTNQY  
PFMSMTSCGNEPLFQDGKCGACYQIRCTNNPSCSGQPRTVIITDMNYYPVARYHFDLSGTAFGAM  
ARPLNDQLRHAGIIDIQFRRVPCYHRGLYVNFHVEAGSNPVYLAFLVEFANKDGTVVQLDVMES  
LPSGKPTRVWTPMRRSWGSIWRLDANHRLQGPFSLRMVSESGQTVIAHQVIPANWRANTNYGSK  
VQFR

>**OsEXPB3 (UniProtKB accession number Q336T5)**

MAFSISKKAAVAALFSFLVVTVCVAGARPGNFSASDFTADPNWEVARATWYGAPTGAGPDDDGGAC  
GFKNTNQYPFSSMTSCGNEPIFKDGKCGSCYQIRCVNHPACSGNPETVIITDMNYYPVSKYHFDL  
SGTAFGAMAKPGQNDQLRHAGIIDIQFKRVPCNFPGLKVTFHVEEGSNPVYFAVLVEYEDGDGDV  
VQVDLMEANSQSWTPMRESWGSIWRLDSNHRLTAPFSLRITNESGKQLVASQVIPANWAPMAVYR  
SFVQYSS

>**OsEXPB4 (UniProtKB accession number Q94LR4)**

MGSLSSLAATAVFLSLLAVGHCAAADFNATDADADFAGNGWDFNSSDAAVYWGPPWTKARATWY  
GQPNGAGPDDNGGACGFKHTNQYPFMSMTSCGNQPLFKDGKCGSCYKIRCTKDQSCSGRSETV  
IITDMNYYPVAPFHFDLSGTAFGR LAKPGLNDKLRHSGIIDIEFTRVPCEFPGLKIGFHVVEYSNPVYF  
AVLVEYEDGDGDVVQVDLMESKTAHGPPGTGKWTPMRESWGSIWRLDTNHRLQAPFSIRIRNESGK  
TLVANNVIPANWRPNTFYRSFVQYS

>**OsEXPB5 (UniProtKB accession number Q7XT39)**

MVSRGTFVFAVLVALPILSLPVSGYEQNYTAGRRSTMSLGRGYGWSSGGATWYGGPQGDGSEGA  
CGYQSAVGQRPFSMIAAGGPSLFKNGKCGSCYQIKCTGNRACSGRPVTVVITDSCPGGVCLNEA  
AHFDMSGTAFGAMANRGMGDR LRSAGVLKIYKRVPCRFAMNVAFKVDAGSNPYLAILVQYAN  
GDGDLAAVHIMKARGGGGWKAMQSWGATWRLNSNTGKPLSPFIRSIRLTSGSGKVLVANNVIPSG  
WQAGLTYRSTVNAAA

>**OsEXPB6 (UniProtKB accession number Q7XCA7)**

MAARMGSKVAAILAILSVLVVHGSCKGHPVNYNVSDASAYGSGWLPARATWYGAPTGAGPDDN  
GGACGFKNVNQYPFSSMTSCGNEPIFKDGKCGSCYQIRCNDPSCSGNIETVIITDMNYYPVARY  
HFDLSGTAFGAMAKPGLNDKLRHSGIIDIQFRRVPCNYPGLKINFHVEEGSNPVYFAVLVEYEDLDG  
DVVQVDLMESKSAYGGATGVWTPMRESWGSIWRLDSNHRLQAPFSLRIRSDSGKTLVANNVIPAN  
WSPNSNYRSIVQFS

**>OsEXPB7 (UniProtKB accession number Q9LD07)**

MAGRSRRRSFWSVGVAAALLCLLAHGCsAKHHKPKPTPGGISGNASSSSNSSTPSIPPPVAPTPT  
APTPPIPSPTGSSNGSSGGGGGWLNARATWYGAPNGAGPDDNGGACGFKNVNLPFSAMTSC  
GNEPLFKDGKCGSCYQIRCVGHPACSLPETVIITDMNYYPVSLYHFDLSGTAFGAMAKDNRND  
ELRHAGIIDIQFRRVPCQYPGLTTFHVEEQSNPVYMAILVEYENGDDGDVVQVDLMESRYSTGGVD  
GTPTGVWTPMRESWGSIWRLDTNHPLQGPFSLRITNESGKTLIADQVIPADWQPNTVYSSIVQFD

**>OsEXPB8 (UniProtKB accession number Q10T32)**

MVSGDVGVVVYLLLVVVVQGCKGSSAVQGEGRWYNESEAIGGAAAWGNAKATWYGQPNGA  
GAADNGGACGFKKNQYPFMGMTSCGNQPLYKGGKCGSCYRVRCNRNPACSGNAQTVAITDM  
NYFPLSQYHFDLSGIAFGRLAKPGRADDLRRAGIIDVQFARVPCEFPGLKVGHFVEEGSSPVYLAVL  
VEYENGDDVAQVDLKEAGAGGGRWTPMRESWGSVWRLDSNHRLRAPFSIRIRSDSGKTLVAPD  
VIPLNWTPTFYRSFVQYSS

**>OsEXPB9 (UniProtKB accession number Q7XCG7)**

MGLSTTNIVLAVAVVAALVGGGSCGPPKVPVPGPNITTNYNAPWLPARATWYGQPYGSGSTDNGGA  
CGIKNVNLPYNGMISCGNVPIFKDGRGCGSCYEVKCEQPAACSKQPVTVFITDMNYEPISAYHFD  
FSGKAFGAMACPGKETELRKAGIIDMQFRRVRCKYPPGGQKVTTFHVEKGSNPNYLAVLVKVVADDG  
DVIQMDLQEAGLPAWRPMKLSWGAIWRMDTATPLKAPFSIRVTTESGKSLIAKDVIPVNWMPDAI  
YVSNVQFY

**>OsEXPB10 (UniProtKB accession number Q8H7T4)**

MASSCLLLACVVAAMVSAVSCGPPKVPVPGPNITAAAYGKQWLEARGTWYGKPKGAGPDDNGGA  
CGYKDIDKAPFLGMNSCGNDPIFKDGKCGSCFEVKCSKPEACSDKPVIIHITDMNTEPIAAYHFDL  
SGHAFGAMAKEGKDEELRKAGIIDMQFRRVRCKYPPGETKVTTFHVEKGSNPNYFAVLVKYVGGDG  
DVVKVELKEKGSEEWKPLNESWGAIWRIDTPKPLKGPFSLRVTTESDQKLVANDVIPDNWKANAL  
YKSEIQVD

**>OsEXPB11 (UniProtKB accession number Q6H676)**

MAKSCTLVLLLVALVGLSLLVSPIACSRKLSKPKPKPKPSMKKPVVRAHNNYTGSPSVTVTGWAA  
AGATYYGAPNGDGSDDGACGYQTAVGQRPFSMIAAGSPSLYKGGKCGGACYEVKCTTNAACSG  
QPATVVITDECPGGICLAGAAHFDMSGTSMGAMAKPGMADKLRAAGILQVQYRRVPCYSGVNI  
AFRVDQGANPFYFEVLIEFEDGDGDLNAVDLMEAGCGWTPMVQNWGALWRYNSNTGKALKAPF  
SLRLTSDSGKVLVANNVIPASWKPGVTYRSLVNYS

**>OsEXPB12 (UniProtKB accession number Q10G40)**

MAAFEPHRLQLLYFIAITVLASVFPCTSIELHRELSGWSNGIATWYGDPNGAGSEGGACGYQYAV  
DQPPFSSRIAAGSPYIYDSGKCGSCYRVVCAGNEACSGIPVTVVITDQGPGGPCLEELVDGQCMN  
EAAHFDMSGTAFGAMARPGQADQLRGAGLLQIQYTRVECEWTGVGLTFVVDSGSNPNYLALLVE  
YDDNDSDLAAVDIMPIGAGASGSWIPMQQSWGAVWRLNSGSALQGPFSVRLTFSSQMFVASNAI  
PAGWNPGMAYQPGGVAMRVRGRNGGRRGYEAVGMLGGLCHLLLLLLLLMLFEL

**>OsEXPB13 (UniProtKB accession number Q946J4)**

MASSLLLLASVVVAAMVSAVSCGPPKVPVPGPNITASYGDKWLEARATWYGAAKAGARKDMSGAC  
GYKDVDKAPFLGMNSCGNDPIFKDGKCGSCFEIKCSKPKACSDKPVLIHVTDMNDEPIAAYHFD  
LFGLAFGAMAKDGKDEELRKAGIIDT\*FRRFKCKYPADTKITFHIEKASNPNYLALLVKYVAGDGD  
VVEVEIKEKGSEEWKALKESWGAIWRIDTPKPLKGPFSVRVTTTEGGEKIAEDAIPDGWKADSVYK

SNVQAK\*

>OsEXPB14 (UniProtKB accession number Q6H677)

MALAAKLLPSIVAFVALACCVLRSSVASVDHHRKLSGWSIGGATWYGPANGSGTDGGACGYQGD  
VGQPPFNSMIAAGSPSIYESGKGCSCYQVKCSGNPSCSGKPVTVVLTDLCPGGACLEEPVHFDLS  
GTAFGAMAKPGQDDQLRNAGKLPVQYARVPCWKQGVDFIAFRVDAGSNQYYLAVLVEDEDGDGD  
LSAVDLMQSGGSGGGGWAAMQOSWGAVWKYNSGPAPLQAPMSIRLTSGSGRTLVAASNVIPAGW  
QPGGTYSIVNFRRED

>OsEXPB15 (UniProtKB accession number Q7XT40)

MASRFQLILSTFVVIAAVTMLPRPCASIEFHRKLSWSNNGGATWYGAANGAGSDGGACGYQGAVF  
QAPFSSMIAAGSPSIYKSGLGCGSCYQVKCTGNSACSGNPVTVVLTDECPGGPCLSEPVHFDLSGTA  
FGAMANPGQADQLRAAGVLQIQYNRVPCNWGGVKLTFVVDVGSNPNYFAVLVKYENGDDGDLG  
VELMQTGAGAAWTQMQQSWGAVWKLNAGSALQAPFSIRLTSSSGKTLVAASNVIPSGWKPGMSYIS  
TVNF

>OsEXPB16 (UniProtKB accession number Q0DZ85)

MLIRSVLFLVSLLSAAFVFDSEAGAAHRVVDPEWHPATATWYGSADGDGSDGGACGYGTLVDVV  
PMKTRVGAVSPVLFKGGEGCGACYKVRCLDASICSRRRAVTVIVTDECPGGVCAFRTHFDLSGAAF  
ARLAVAGHGGQLQNRGEISVVYRRTACKYGGKNIAFHVNEGSTTFWLSLLVEFEDGDGDIGSMQL  
KQANSAQWQDMKHIWGATWSLTPGPLVGPFSVRLTTLTRQTLAQDVIPKNWTPKATYTSRLNF  
A

>OsEXPB17 (UniProtKB accession number Q7X6J9)

MAAASSRSFSLCVLLLLLLLAPPISASFLFDGGKSKSAAAAAVDMEWRPATATWYGDAEGDGST  
GGACGYGSLVDVVPMKARVGSVSPVLFKDGEGCGACYKVKCLDHGICSRRRAVTVIVTDECPGGL  
CAFRTHFDLSGAAFSRMAVAGAGGHLRDRGQLSVVYRRTACKYGGKNIAFRVNEGSTNFWLSLL  
VEFEDGQGDIGSMQIKQANSVEWLDMKHVWGATWCLVRGPLVGPFSVRLTTLAQKALTARDVIP  
RNWKPTATYTSRLNFEAAL

>OsEXPB18 (UniProtKB accession number Q5W6Z9)

MNSKFQLILSTFVVIAAFTLLPRPCASIEFHRKLSWSNNGGATWYGAANGAGSDGGACGYQAAVD  
QAPFSSMIAAGSPSIYKSGLGCGSCYQVKCSGNSACSGNPVTVVLTDECPGGPCLSEPVHFDLSGTA  
FGAMANPGQADQLRAAGVLQIQYNRVPCNWGGVMLTFAVDAGSNPSYFAVLVKYENGDDGDLG  
MDLMQTGAGAAWTPMQSWGAVWKL SAGAALQAPLSIRLTSSSGKTLVAASNVIPSGWKPGASYT  
STVNY

>OsEXLA1 (UniProtKB accession number Q10S70)

MAVSVRCCFGSSSLSHHARLLLIVIVALLAPRLASGCDRCVRRSRAAYTSSLTLTAGSCGYGTAAT  
FNGGGFLAAAGPALYRGGVGCACGYQVRCKDKKLCNAGARVVVTDRARTNRTGLVLSSPAFAA  
MARPGMAASLTELAAVDVEYKRVPCYRHRSLSVRVDERSRGPNELTISFLYQGGQTDIVAVDVAQ  
VGSSSWKFMTRHGPSWSMANAPPGLQMLVVVTGGYDGGKVVWADREVLPRRWRAGEVYDTG  
VQITDIAQEGCFPCDTHEWK

>OsEXLA2 (UniProtKB accession number Q7XCL0)

MAVRCCSSMASASVVLFFVVVGMSASMVSGCDRCVRRSKAGFRDSSIALNAGSCGYGSLAASFN  
GGHLAAASPALFRGGVGCACFQVRCKDGKLCSTAGAKVVVTDEARSTNRTDLVLSAAAYAAMA  
RPGMAAQLRTRRAVDVEYKRVPCYAAGRNLSIRVEEKSRPPRELSIRFLYQGGQTDIVAVDVATVG  
SSNWKFMTRDYGPAWSTAQAPAGPLQFRVVVTGGYDGGKVVWADGEVLPRRWTAGRVYDAGVQI  
ADVAQEGCYPCDTQEWK

>OsEXLA3 (UniProtKB accession number Q8H274)

MAVLLSILSSSFLLLAASSSTPRASACERCVRNGKAAYSPSLSPLPPGGGGCGYGAMAMEMEL  
NGGFLAAGGPRQHRGGLGCGRCFQMRCRNAEVCNAGVRVVLTDFHRSNSTDFLLGGPAFAGLA

KPGMAHKLKKLDALSVEYRRIPCDYKDKNLSILVEEQSKRPNNLVIKFLYQGGQTDILAVDVAQVG  
SSDWRFMTRVYGPVWSIDRAPNGPLQFRAVVTGGYDGKVVWADREVL PANWQPGQVYDTGARI  
ADVARESCLD CATLDWK

>OsEXLA4 (UniProtKB accession number Q5Z980)

MDDNGDVHFC HRATAVVALLLHLVVANAAAHSCDWCTPRHSTVSILPTPTTHAAHLTGGACGFG  
AAPMELNVA AVTADLFRHGHACGACYQLRCRDRRLCGEDGVKVVVADMAKQPEQEGEMNRTAG  
GSLQFRITEDAF AAMAKQGVSAHELTRQRTLEVDFRRIPCEYRESRRLAVRVEEASRNPTHLAIRFL  
YQGGQTDIA AVEIAQANATPPSSSYSSWRYMTRRDGAPGVWTTSRAPVGPLRLRVVVTAGSGGK  
WLRSDGEVLPADWRPGEVYDTGLRVTDVA VRSCSLSCAIQDMDSDDGEEEEELR

>OsEXLB1 (UniProtKB accession number Q850K7)

MAQLLRHLPVILSLILFLSKATADANFTVSRAAYYPNSDIKGTENGACEYGAFGATLNNGDVSAS  
ASLYRDGVGCGACYQVRCTNPYYCSPNGVTIVITDSGASDGTDFILSQHAFTRMAQSTDAGTALLT  
LGVVGIEYRRV SCTYPNKNIVFKITESSNFPNYLEFEIWIYQQGNQDIIVQLCETVNLTCQLLSRTHG  
AVWAAVSPPSGPLSIRMLFSSGAPRGGDTWLVPTNIVPQNWTAGATYDSGVQVQLQ



**Text S3 Promoter and gene sequence of *HvEXPB7* in XZ5, XZ54 and Tadmor.** Yellow represents RHEs in promoter; Red represents SNPs in CDS; green represents intron; pink represents start and stop codons.

**XZ5 (GeneBank accession number KT000616)**

TTCGCAAGTTTAAATCATCACAAGTTCAACATCACAACAAAAGTATCATCATAACAAGAAAAGC  
AACAAAGTCATGTAAAAGGCATAGAAGACCGTCAAGTTTGTTCATCGCAAAGGCTTAAGCCACGT  
CACCACCATCGCAAAGCCAAGATCACCAAAGCCGAGGTCCTACCCTACCCTACCCTACCCTACCCT  
CACCTCGCTAGACCGGAGTGACTGGGCTACTTACTCAGGAGTGGAACCATCATTAGCATCACC  
ACCGGCTGATGATCCATCGGTTCCCTACATGTTTGAAGAGATGGTAAGGCGATATATGATTGT  
ATTGACTAAACAATAAGTTGTGGTTGAATAGTTTGGTGATGTACTAACCCGGGTGAAATAGTGT  
GGGACACAAATTGTTCAAACGTAGGCAGCATAGCTTGTTCGTCAGGAGGTGGTGGTGGTGGTA  
CCATTGTCGGAATCTGCCCGAATGCTATAGATGTAAACATAATCTTCGTCATGCGAGTGTGTGC  
TCCGTGGCTGCTGCAACTCTCTGGTTCCAGTCAAAGAGCTGCTGACATGGGAACTCCAAGTAG  
ACCTACAATATGACATGATGGAAGTATAAACCACAACAATGCGAATAATAAGGGTCGAAAGAA  
TGAAGATAACAAGGAAAATACTTACAGCGTGCTGCTTGGCTAGGATGGACTATGCACTGGATGT  
ACTCGGGTGTGGCATGACCTCGGCCTCGGTTTGGTAGCTCCGGTTCGTTGTACGAGACAGAGA  
AGGGATGATCACAGGAGACAGAAGGGATGATCACAGAATCCCGAACCCTGCGGACCATGAC  
TCTTCGGCCATATGCTGACCATCGCTATCTCGTTGGTATCCATAGACATGGGGTCTGATGTGCCA  
GGATAACACTTCTAAAACAGCTCTGTGTAGGACGCCAGGTTCTCCTCGGTATCGCCGTAGTACT  
GACCCACCAGCCTTTCGATTAGTCCACGCACCGGGCGAGCCCCACGACTCGATGTCTAAG  
AGCGGCCGCTTCAATTTCTCCTCCTAGACTGCCAATTAGAGGTTTGTACACAAAAGAACATAC  
GGTAAATAGAAGATCAAGAATGTTTCATGTACATATATACCTGAAGTTTCTTGTGATGCGAGT  
GGTCCGGTTTCCCTCACCGTGTGTTCCGTCAGATCCTCGATTAGCTTTGTTTGTGTTGCTCTTG  
GCAGAAAATTGATCCACAGATCCACCAATCTCGCCATCCATCATTCTTTCCAAAGCACCAATT  
AGGAGGCACCTACATAATGAATCATAATGGCATGTGAACACGAAACAATGAAATTTACCACAA  
ACGTCGGAATGAAAAGTATGTTATACTTACCAACATGTACTGCTCCCTAGTCATGGTAAGGTTCT  
GTGCCGCGCTTCTTCTTGGCTATCTTCTCGCCAGAACAGTGTGATAATACGTCGGATGGCCA  
CCCAAAGCACCTCGTATTGTATTGTGTCAGGTCTGCTTCCCTCGCAGCCCGCAGCACGAACTCATC  
GGCCTTGTCTTATGCTCCTGAAGAATTTCTATAGCATGGCAACCCTTTAGCCAGCACTGCAAA  
TCCGAGGATGAAAATTTTACCATTACCTTTTCTAGGCTTACGATTTTATATGTTGCAATCATGG  
CAAAAATAAATGAAAGTACATGGCAATTACTGGGCTGCAACATGAAAATTTCCAGACAATTTT  
TTGTATAACATGACAACTTTTACTATAACAACAGCAGAGACAGATCATGACGTGGCCGGAGAAA  
AGTGGGTGGTTTGTGTTGCAATGGCCAGATTGTGTAGATGTTCCAACAATTTGTACTAGTCTTGT  
CCATTGTATCTTTCGATGCTTCGTTATTTTGTACCCGGATGGATTTTAGGGTTGTATTATGCCGTG  
TCATGGACTGACGGCCTCACGGTTCGCTGTAAACCAAAACCTTTATCAGATTATTTTAGCATGT  
CCTGATCGGCTACTGATGCGCACGTAGCTTAAGATGGGTATACTAGTTTGGTATTTTGGAAAGTAC  
ATAGACACGCGAGCTAGCGCTCCACTGGTTACAGGACAAATCATGTGGCTTTATATGGTCGGCA  
ATTTGCATCATATGCTGGCTGCCGGCATGTCATACACAGTACTTGTATGTAGAGTGTATATATATGT  
GTATGGTGGATGATCCGTAAAAAAAATGTATGGTTGATGATGGAAGATGTTTTTTAAAACATAA  
AAGCAGAGAGAAATGCATCTCGTGACCACGGGCAAGGGTGTAAAGCAGCCGGTTGAGTGCCTC  
CATCCATGCACATGTGAACCGGTAGGGCCCAAGATTGCCAATCACCAGTCATCTCCATTCAATCC  
TTCTTCTTCCCTTTGATCTCCAGAAGCACCTCACTGGCTGGCCTATAAATTCGCAATCTCCCA

ACGGCATTAAACCACCAGAGTAGGGTCATCGATCAGTAACCAACGAGACCAGCAAGCGAGCCAT  
GGCAGCGCCCTTTTCCTCCTACTCCGTCGCGGCCGCTTTCCTCTGCCTGCTCGCCGCCAACGGC  
TGCTGCGGCTGCCCTGGTTTCTCCCTGCTACATTCTGCCCTGAACCGACACCCGACCCCATAC  
CTACACCTGACCCCGCTCCAGCTACACCTCCGCTGCTCTGGCTACCCAGCCAGGCTCCGG  
CTCTGGCAGCGCCAACGGTTCCATGGGCGGCTGGCTGGACGCCAGGCCACATGGTACGGCGC  
TCCGGATGGCGCCGGGCCGTTGGACAACGGTGGCGCGTGCGGGTTCAAGAACGTGAACCTGC  
CGCCCTTCAACGCCATGACGTCTGTCGGCAACGAGCCGATCTTCAAGGACGGCAAGGGATGCG  
GCTCCTGCTACCAGGTCAGCCGTTAATTATTGCTTGACATTGACAGTACGTGCTTGTCTGCTCC  
GTTTATCCAGCTCCAAACTGATGCATTATTGTTGCACGCAGATAAGGTGCGTGGGCAAGGTTT  
ACCCAGCGTGCTCCGGCGACCCCGAGACGGTGATCATCACCGACATGAACTACTACCCGGTTCG  
CCCGTACCACTTCGACCTCAGCGGCACTGCCTTCGGCGCCATGGCCAAGGACGGCCGCAACG  
ACGAGCTCCGCCACGCCGGCATCATCGACATGCAGTTCAAGAGGGTGCCGTGCCAGTACACAG  
GGCTGTCCGTGACGTTTACGTGGAGAAGGGGTGCAACCCGAATTACCTGGCGATCCTGGTGG  
AGTACGGGAACGGCGACGGCGACGTGGCGCAGGTGGACCTCATGGACGGCGGGCAGCCAACG  
GTGTCCTGGAGGCCGATGAGGGAGTCTGGGGCTCCATCTGGCGCCTGGACACGCGGCGCCCG  
CTTCGGGGGCCCTTCTCGCTGCGGGTACCAACGGGTCCGGCAGGTGCTCGTCGCGGACCAG  
GTCATCCCCGCCGACTGGCAGCCCGACACCGTGTACAGCTCCGACGTCCAGTTCGATGAATGA

**XZ54 (GeneBank accession number KT000617)**

TTCGCAAGTTTAAACATCATCACAAGTTCAACATCACAACAAAAGTATCATCATAACAAGAAAAG  
CAACAAGTCATGTAAAAGGCATAGAAGACCGTCAAGTTTGTTCATCGCAAAGGCTTAAGCCACG  
TCACCACCATCGCCAAAGCCAAGATCACCAAGCCGAGGTCCTACCGTACCCTACCGCC  
ACACCTCGTAGACCGGAGTGACTGGGCTACTTGACTCAGGAGTGGAAACCATCATTAGCATCA  
CCACCGGCTGATGATCCATCGATTCCCTACATGTTTAAAAGAGATGGTAAGGCGATATATGATT  
GTATTGACTAAACAATAAGTTGTGGTTGAATAGTTTGGTGATGTAATAACCCGGGTGAAATAGTG  
TTGGGCCACAAATTGTTCAAACGTAGGCAGCATAGCTTGTTCGTCAGGAGGTGGTGGTGGTGG  
TACCATTGTCGGAATCTGCCTGAATGCTATAGATGTAACATAATCTTCGTCATGCGAGTGTGT  
GCTCCGTGGCTGCTGCAACTCTCTGGTTCAGTCAAAGAGCTGCTGACGTGCGAACTCCAAGT  
AGACCTACAATATGACATGATGAACTGATAAACCACAACAATGCGAACAATAAGGGTTCGAAA  
GAATGAAGATAACAAGGAAAATACTTACAGCGTGTGCTTGGCTAGGATGGACTATGCACTGGA  
CGTACTCGGGTGCTGGCATGACCTCGGCCTCGGTTTGGTAGCTCCGGTTCGTTGTGTACGAGAC  
AGAAGGGATGATCACAGGAGACAGAAGGGATGATCACAGAATCCCGAACCGACTGCCGACCA  
TGACTCTTCGGCCATATGCTGACCATCGCTATCTCGTTGGTATCCATAGACATGGGATCTGATGTG  
CCAGGATAACCACTTCTAAAACAGCTCTATGTAGGACGCCAGGTTCTCCTCGGTATCGCCATAGTA  
CTGACCCCCACCAGCCTTGCATTAGTCCGCGCACGGGCGAGCCCCACGACTCGATGTCTAA  
GAGCGGCCGCTTCAATTTCTCCTCCTAGACTGCCAATTAGAGGTTTGTACACAAAAGAACATA  
CGGTAAATAGAAGATCAAGAATGTTTCATGTACATATATATACCTGAAGTTTCTTGTGATGCGAG  
TGGTCCGGTTTCCCTACCGTGTGTTCCGTCAGATCCTCGATTAGCCTTGTGTTGTGTTGCTCTT  
GGCAGAAAACCTGATCCACAGATCCACCAATCTCGCCATCCATCATTCTTCCAAAGCACCAA  
TTAGGAGGCACCTACATAATGAATCATAATGGCATGTGAACACGAAACAATGAAATTTACCACA  
AACGTCGGAATGAAAAGTATGTTATACTTACCAACATGTAAGTCTCCCTAGTCATGGTAAGGTTT  
TGTGCCGCGCTTCTCCTTGGCTATCTTCTCGCCAAAACAGTGTGATAATACGTCCGGATGGCC  
ACCCAAAGCACCTCGTATTGATTTGTCAGGTCGCTTCTCGCAGCCCGCAGCACGAACTCAT  
CGGCCTTGTCTTATGCTCCTGAAGAATTTCTATAGCATGGCAACCCCTTAGCCAGCACTGCAAA  
TTCCGAGGATGAAAATTTTACCATTACCTTTTCTAGGCTTACGATTTTATATGTTGCAATCATG  
GCAAAAATAAATGAAAGTACATGGCAATTACTGGGCTGCAACATGAAAATTTCTGACAATTTT  
TTTGTATAACATGACAACCTTTACTATACAACAGCAGAGACAGATCATGACGTGGCCGGAGAAA

AGTGGGTGGTTTGTGGCAATGGCCAGATTGTGTAGATGTTCCAACAATTTGTACTAGTCTTGT  
CCATTGTATCTTTTCGATGCTTCGTTATTTTGTACCCGGATGGATTTTAGGGTGTATTAT **GCCGTG**  
**TCATGGACTGACGGCCTCACGGGTAGGGTGTAAACAAAACCTTTATCAGATTATTTAGCATGTC**  
CTGATCGG **CTACTGATGCGCACGTAG**CTTAAGATGGGTATACTAGTTTGGTATTTTGGAAAGTACA  
TAGACACGCGAGCTAGCGCTCCACTGGTTACATGACAAATCATGTGGCTTTATATGGTCGGCAAT  
TTGCATCATATGCTGGCTGCCGGCATGTCATACACAGTACTTGTATGTAGAGTGTATATATATATGT  
ATGGTGGATGATCCGTAAAAAATGTATGGTTGATGATGGAAGATGTTTTTTAAAACATAAA  
AGCAGAGAGAAATG **CATCTCGTGACCACGGG**CAAGGGTGTAAAGCAGCCGGTTGAGTGCCTCC  
ATCCATGCACATGTGAACCGGTAGGGCCTTGATGCCAATCACCAGTCATCTCCATTCATTCCTTC  
CTTCTTCCTTTTGTATCTCCAGAAGCACCTGAGTGGGTGGCCTATAAATTCGCAATCTCCCCGACG  
GCATTAACCATCAAAGTAGGGTCATCGATCAGTAACCAACGAGACCACAAGCGAGCCAT **GTGCA**  
GCG **ACCTTTTCCTCCTAC** **GCGATCGCGG** **TCGCTTTCTCTGCCTGCTCGCCGCCAACGGCTGCA**  
GCGGCTGCCCTGGTTTCTCCCTGCTACATTCTGCCCTGAACCT **TACACCCGACCCCATACCTACA**  
CC **AAACCCCGCTCCAGCTACACCTCCGCTGCTC** **GCGGACCA** **CCAGCCAGGCTCCGGC** **GCT**  
GGCAGC **ACCAAT** **GGTTCCA** **CCGGCGGCTGGCTGGACGCCAGG** **CCACATGGTACGGCGCTCCG**  
GATGGCGCCGGGCCGTTGGACAACGGTGGCGCGTGGCGGTTCAAGAACGTGAACCTGCCGCC  
CTTCAACGCCATGACGTCGTGCGGCAACGAGCCGATCTTCAAGGACGGCAAGGGATGCGGCTC  
CTGCTACCAG **GTCAGCCGTTAATTATTGCTTGACATTGACAGTACGTGCTTGTCGTTCCGTTT**  
**ATCCAGCTCCAACTGATGCATTATTGTTGCACGCAG**ATAAGGTGCGTGGCAAGGTTACCC  
AGCGTGCTCCGGCGACCCCGAGACGGTGATCATCACCGACATGAACTACTACCCGGTCGCCCG  
CTACCACTTCGACCTCAGCGGCACTGCCTTCGGCGCCATGGCCAAGGACGGCCGCAACGACGA  
GCTCCGCCACGCCGCATCATCGACATGCAGTTCAAGAGGGTGCCGTGCCAGTACACAGGGCT  
GTCCGTGACGTTTACGTGGAGAAGGGTTCGAACCCGAATTACCTGGCGATCCTGGTGGAGTA  
CGGGAACGGCGACGGCGACGTGGCGCAGGTGGACCTCATGGACGGCGGCGAGCCAACGGTGT  
CCTGGAGGCCGATGAGGGAGTCCCTGGGGCTCCATCTGGCGCCTGG **ACCGCGGCCCCGCTTC**  
GGGGGCCCTTCTC **CTGCGGGTACCAACGGGTCCGGCAGGTCGCTCGTCGC** **GACCAGGTCA**  
TCCCCGCCGACTGGCAGCCCGACACCGTGTACAGCTCCGACGTCCAGTTCGATGAAT **TGA**

**Tadmor (GeneBank accession number KT000618)**

TTCGCAAGTTTAAACATCATCACAAGTTCAACATCACAACAAAAGTATCATCATAACAAGAAAAG  
CAACAAGTCATGTAAAAGGCATAGAAGACCGTCAAGTTTGTATCGCAA **AGGCTTAAGCCACG**  
**TC**CACCACCATCGCCAAAGCCAAGATCACGAAAGCCGAGGTCCTACCCTACCGTACCGGCC  
ACACCTCGCTAGACCGGAGTGAAGTGGGCTACTTGACTCAGGAGTGGAAACCATCATTAGCATCA  
CCACCGGTTGATGATCCATCGGTTCCCTACATGTTTGAAGAGATGGTAAGGCGATATATGATT  
GTATTGACTAAACAATAAGTTGTGGTTGAATAGTTTGGTGTACTAACCCGGGTCAAATAGCG  
TTGGGCCACAAATTGTTCAAACGTAGGCAGCATAGCTTGTCTGTCAGGAGGTGGTGGTGGTGG  
TACCATTGTGCGAATCTGCCCGAATGCTATAGATGTAAACATAATCTTCGTCATGCGAGTGTGT  
GCTCCGTGGCTGCTGCAACTCTCTGGTTCCAGTCAAAGAGCTGCTGACGTGCGAACTCCAAGT  
AGACCTACAATATGACATGATGAACTGATAAACCACAACAATGCGAACAATAAGGGTTCGAAA  
GAATGAACAACAAGGGAAAATACTTACAGCGTGTCTGCTTGGCTAGGATGGACTATGCACTGGA  
CGTACTCGGGTGTGGCATGACCTCGGCCTCGGTTTGGTAGCTCCGG **TTCGTGTGTACGAGAC**  
**A**GAAGGGATGATCACAGGAGACAGAAGGGATGATCACAGAATCCCGAACCAACTGCCGACCA  
TGACTCTTCGGCCATATGCTGACCATCGCTATCTCGTTGGTATCCATAGACATGGGGTCTGATGT  
GCCAGGATAACCACTTCTAAAACAGCTCTGTGTAGGACGCCAGGTTCTCCTCGGTATCGCCGTAG  
TACTGACCCCCACCAGCCTTGCAT **TAGTCCGCGCACGGG**CGAGCCCCACGACTCGATGTCT  
AAGAGCGGCCGCTTCAATTTCTCCTCCTAGACTGCCAATTAGAGGTTTGTACACAAAAGAACA  
TACGGTAAATAGAAGATCAAGAATGTTTCATGTACATACATACCTGAAGTTTCTTGTGATGCG

AGTGGTTCCGGTTTCCCTCACCGTGTGTTCCGTGTCAGATCCTCGATTAGCCTTGTGTTGTGTTGCTC  
TTGGCAGAAAACCTTGATCCACAGATCCACCAATCTCGTCCATCCATCATTCTTTCCAAAGCACC  
AATTAGGAGGCACCTACATAATGAATCATAATGGCATGTGAACACGAAACAATGAAATTTACCA  
CAAACGTTCGGAATGAAAAGTATGTTATACTTACCAACATGTACTGCTCCCTAGTCATGGTAAGGT  
TCTGTGCCGCGCTTCTTCCCTTGGCTATCTTCTCGCCCAGAACAGTGTGATAATACGTCCGGATGG  
CCACCCAAAGCACCTCGTATTGTATTTGTCAGGTCTGCTTCCTCGCATCCCGCAGCACGAACTC  
ATCGGCCTTGTCTTATGCTCCTGAAGAATTTCTATAGCATGGCAACCCTTTAGCCAGCACTGCA  
AATTCGAGGATGACAATTTTCACCATTTACCTTTTCTAGGCTTACGATTTTATATGTTGCAATCA  
TGGCAAAAATAAATGAAAGAACATGGCAATTACTGGGCTGCAACATGAAAATTTCTGACAATT  
TTTTTGTATAACATGACAACCTTTACTATAACAACAGCAGAGACAGATCATGACGTGGCCGGAGA  
AAAGTGGGTGGTTTGTGTTGCAATGGCCAGATTGTGTAGATGTTCCAACAATTTGTACTAGTCTTG  
TTCCATTGTATCTTTTCGATGCTTCGTTATTTTGTACCCGGATGGATTCTAGGGTGTATTATGCCG  
TGTCATGGACTGACGGCCTCACGGGTAGCGTGTAAACCAAAACCTCTATCACATTATCTTAGCAT  
GTCCTGATCGGCTACTGATGCGCACGCTAGCTTAAGATGGGTATACTAGTTTGGTATTTTGGAAAGT  
ACATAGACACGCGAGCTAGCGCTCCACTGGTTACATGACAAATCATGTGGCTTTATATGGTCCGG  
CAATCTGCATCATATGCTGGCTGCCGGCATGTCATACACAGTACTTGTATGTAGAGTGTATATATA  
TATGTATGGTGGATGATCCGTAAAAAAATGTATGGTTGATGATGGAAGATGTTTTTTAAAACAT  
AAAAGCAGAGAGAAATGCATCTCGTGACCACGGGCAAGGGTGTAAAGCAGCCGGTTGAGTGCC  
TCCATCCATGCACATGTGAACCGGTAGGGCCTTGATGCCAATCACCAGTCATCTCCATTCAATCC  
TTCTTCTTCTTTTGATCTCCAGAAGCACCTGAGTGGGTGGCCTATAAATTCGCAATCTCCCCG  
ACGGCATTAAACCATCAGAGTAGGGTCATCGATCAGTAACCAACGAGACCAGCAAGCGAGCCAT  
GGCAGCGACCTTTTCTCCTACCGGATCGCGGTTCGCTTCTCCTCTGCCTGCTCGCCGCCAACGGC  
TGCAAGCGGCTGCCCTGGTTTCTCCCTGCTACATTCTGCCCTGAACCTTACACCCGACCCCATAC  
CTACACCAAAACCCCGCTCCAGCTACACCTCCGCCTGCTCCGACCAACCAGCCCAGGCTCCG  
GCGCTGGCAGCAACCAATGGTTCCAACGGCGGCTGGCTGGACGCCAGGAACCACATGGTACGGCG  
CTCCGGATGGCGCCGGGCCGTTGGACAACGGTGGCGCGTGCGGGTCAAGAACGTGAACCTG  
CCGCCCTTCAACGCCATGACGTCGTGCGGCAACGAGCCGATCTTCAAGGACGGCAAGGGATGC  
GGCTCCTGCTACCAGGTCAGCCGTTAATTATTTGCTTGACATTGACAGTACGTGCTTGTGCTTC  
CGTTTATCCAGCTCCAAACTGATGCATTCAATTGTTGCACGCAGATAAGGTGCGTGGGCAAGGTT  
CACCCAGCGTGCTCCGGCGACCCCGAGACGGTGATCATCACCGACATGAACTACTACCCGGTC  
GCCCGCTACCACTTCGACCTCAGCGGCACTGCCTTCGGCGCCATGGCCAAGGACGGCCGCAAC  
GACGAGCTCCGCCACGCCGGCATCATCGACATGCAGTTCAAGAGGGTGCCGTGCCAGTACACA  
GGGCTGTCCGTGACGTTTACGTGGAGAAGGGGTGCAACCCGAATTACCTGGCGATCCTGGTG  
GAGTACGGGAACGGCGACGGCGACGTGGCGCAGGTGGACCTCATGGACGGCGGCGAGCCAAC  
GGTGTCTTGAGGCCGATGAGGGAGTCCCTGGGGCTCCATCTGGCGCCTGGAGACGCGGCGCCC  
GCTTCGGGGGCCCTTCTCGCTGCGGGTCAACCAACGGGTCCGGCAGGTCGCTCGTCGCACGACCA  
GGTCATCCCCGCCGACTGGCAGCCCGACACCGTGTACAGCTCCGACGTCCAGTTCGATGAATG  
A
